# Supplementary material
Source: PubMed Central journal article supplement (PMC8364929)
Supplement: NIHMS1635518-supplement-1.pdf [file NIHMS1635518-supplement-1.pdf]

Running head: EMPIRICAL STATUS OF MINDFULNESS

Supplemental Materials Table 1. Databases and search terms and fields

| Database                             | Search String            | Search Fields             |
|--------------------------------------|--------------------------|---------------------------|
| PubMed                               | mindful* AND meta-analy* | all fields                |
| CINAHL                               | mindful* AND meta-analy* | all fields                |
| PsycINFO                             | mindful* AND meta-analy* | all fields                |
| Scopus                               | mindful* AND meta-analy* | title, abstract, keywords |
| Web of Science                       | mindful* AND meta-analy* | all fields                |
| Cochrane Database Systematic Reviews | mindful* AND meta-analy* | title, abstract, keywords |

Running head: EMPIRICAL STATUS OF MINDFULNESS

Supplemental Materials Table 2. Study-level characteristics for included meta-analyses

| Study                 | Treatment | Focus        | Comparison                 | Population                                   | Condition                                | k  | n    |
|-----------------------|-----------|--------------|----------------------------|----------------------------------------------|------------------------------------------|----|------|
| Anheyer (2017)        | MBSR/MBCT | Cond         | passive (TAU)              | NA                                           | low back pain                            | 4  | 326  |
| Anheyer (2019)        | MBSR/MBCT | Cond         | passive (TAU)              | NA                                           | tension-type headache /<br>migraines     | 5  | 195  |
| Bawa (2015)           | MBIs      | Cond         | passive, active            | NA                                           | chronic pain                             | 9  | 453  |
| Bohlmeijer (2010)     | MBSR      | Cond         | passive (waitlist)         | NA                                           | adults with a chronic<br>medical disease | 4  |      |
| Chen (2019)           | MBIs      | Pop          | passive (waitlist,<br>TAU) | nursing or allied<br>health care<br>students | NA                                       | 4  | 624  |
| Chiesa (2011)         | MBCT      | Int,<br>cond | passive (TAU)              | NA                                           | depression                               | 4  | 326  |
| Cillessen (2019)      | MBIs      | Cond         | passive, active            | NA                                           | cancer                                   | 29 | 3274 |
| de Abreu Costa (2019) | MBSR/MBCT | Cond         | active (CBT)               | NA                                           | anxiety disorders                        | 4  | 275  |
| Cuijpers (2019)       | MBCT      | Int,<br>con  | passive (waitlist)         | NA                                           | depression                               | 4  |      |

## Running head: EMPIRICAL STATUS OF MINDFULNESS

|                  |           |            |                                                                                               |                         |                                |         |           |
|------------------|-----------|------------|-----------------------------------------------------------------------------------------------|-------------------------|--------------------------------|---------|-----------|
| Demarzo (2015)   | MBIs      | Pop        | passive, active                                                                               | primary care patients   | NA                             | 6       | 553       |
| Dunning (2019)   | MBIs      | Pop        | passive, active                                                                               | children/adolescents    | NA                             | 33      | 3666      |
| Galante (2013)   | MBCT      | Cond       | passive (TAU)                                                                                 | NA                      | depression                     | 4       | 307       |
| Goldberg (2018)  | MBIs      | Comp, cond | passive (no treatment), active (minimal treatment, non-specific active, specific active, EBT) | NA                      | various psychiatric conditions | 14<br>2 | 1200<br>5 |
| Goldberg (2019a) | MBCT      | Int, cond  | specific active                                                                               | NA                      | depression                     | 13      | 1046      |
| Goldberg (2019b) | MBIs      | Comp, out  | passive, active                                                                               | NA                      | various psychiatric conditions | 55      | 4743      |
| Goldberg (2020)  | MBIs      | Comp       | active (bona fide treatments)                                                                 | NA                      | various psychiatric conditions | 60      | 5627      |
| Goyal (2014)     | MBIs      | Comp, out  | non-specific active controls, specific active controls                                        | NA                      | clinical condition             | 36      | 2733      |
| Halladay (2019)  | MBIs      | Pop        | passive (waitlist), active (various)                                                          | post-secondary students | NA                             | 41      | 4211      |
| Haller (2017)    | MBSR/MBCT | Cond, int  | passive (TAU), active comparisons                                                             | NA                      | breast cancer                  | 9       | 1314      |

Running head: EMPIRICAL STATUS OF MINDFULNESS

|                        |                |            |                                                 |              |                               |    |      |
|------------------------|----------------|------------|-------------------------------------------------|--------------|-------------------------------|----|------|
| Hedman-Lagerlöf (2018) | MBIs           | Comp, cond | placebo, TAU, active treatment, other treatment | NA           | common psychiatric conditions | 19 | 1291 |
| Khoo (2019)            | MBSR           | Comp, cond | active (CBT)                                    | NA           | chronic pain                  | 21 | 1842 |
| Kuyken (2016)          | MBCT           | Int, cond  | active, antidepressants                         | NA           | depression                    | 5  | 892  |
| Lenz (2016)            | MBCT           | Int, cond  | passive, active                                 | NA           | depression                    | 31 | 2298 |
| Li (2017)              | MBIs           | Cond       | active                                          | NA           | substance misuse              | 12 | 1456 |
| Li (2019)              | MBSR           | Pop        | passive                                         | older adults | NA                            | 4  | 330  |
| Linardon (2019)        | MBIs           | Out        | passive (waitlist)                              | NA           | NA                            | 10 |      |
| Martin (2018)          | self-help MBIs | Int        | active                                          | NA           | NA                            | 4  | 386  |
| Norman (2019)          | MBIs           | Out        | passive                                         | NA           | NA                            | 4  | 435  |
| Pascoe (2017)          | MBIs           | Out        | active                                          | NA           | NA                            | 5  |      |
| Phillips (2019)        | e-health MBIs  | Int, pop   | passive                                         | employees    | NA                            | 4  |      |
| Piet (2011)            | MBCT           | Cond, int  | passive                                         | NA           | depression                    | 4  | 352  |
| Piet (2012)            | MBSR/MBCT      | Cond, int  | passive (waitlist, TAU)                         | NA           | cancer                        | 9  | 959  |

## Running head: EMPIRICAL STATUS OF MINDFULNESS

|                   |                  |            |                                                                    |                          |                     |    |      |
|-------------------|------------------|------------|--------------------------------------------------------------------|--------------------------|---------------------|----|------|
| Rusch (2019)      | MBIs             | Cond, comp | non-specific active controls, specific active controls             | NA                       | sleep disturbance   | 18 | 1654 |
| Sanada (2016)     | MBIs             | Out        | passive                                                            | healthy adults           | NA                  | 4  | 115  |
| Schell (2019)     | MBSR             | Cond, int  | passive (no treatment)                                             | NA                       | cancer              | 10 | 1571 |
| Spijkerman (2016) | online MBIs      | Int        | passive                                                            | NA                       | NA                  | 7  | 1174 |
| Spinelli (2019)   | MBIs             | Pop        | passive (no treatment, waitlist), active                           | healthcare professionals | NA                  | 19 |      |
| Stratton (2017)   | online MBIs      | Int, out   | passive (waitlist)                                                 | employees                | NA                  | 4  | 203  |
| Strauss (2014)    | MBIs             | Cond       | passive (TAU, waitlist), active (CBT, exercise, psychoeducation)   | NA                       | depression, anxiety | 12 | 578  |
| Teleki (2010)     | MBSR             | Int, out   | passive (waitlist)                                                 | NA                       | NA                  | 12 | 613  |
| Visted (2015)     | Group-based MBIs | Out        | passive (waitlist), active                                         | NA                       | NA                  | 72 | 2901 |
| Wang (2018)       | MBIs             | Cond       | passive (TAU), active (CBT, psychoeducation, walking control, HEP) | NA                       | depression          | 11 | 764  |
| Zhang (2015)      | MBIs             | Cond       | passive (waitlist)                                                 | NA                       | cancer              | 6  | 746  |

Running head: EMPIRICAL STATUS OF MINDFULNESS

---

|              |      |      |                             |    |               |   |     |
|--------------|------|------|-----------------------------|----|---------------|---|-----|
| Zhang (2016) | MBIs | Cond | passive (no treatment, TAU) | NA | breast cancer | 5 | 737 |
|--------------|------|------|-----------------------------|----|---------------|---|-----|

---

Note: MBI = mindfulness-based intervention; MBSR = mindfulness-based stress reduction; MBCT = mindfulness-based cognitive therapy; Int = intervention focus; Cond = condition focus; Comp = comparison focus; Pop = population focus; TAU = treatment as usual; CBT = cognitive-behavioral therapy; HEP = Health Enhancement Program; EBT = evidence-based treatment; k = number of primary studies; n = number of participants; NA = not available.

## Running head: EMPIRICAL STATUS OF MINDFULNESS

Supplemental Materials Table 3. Effect-size level characteristics for included meta-analyses

| Study                 | Comparison | Outcome                                    | Timepoint | k  | n    | ES (d/g) | 95% CI        | I <sup>2</sup> | Pub Bias    | FSN |
|-----------------------|------------|--------------------------------------------|-----------|----|------|----------|---------------|----------------|-------------|-----|
| Anheyer (2017)        | passive    | pain intensity                             | post      | 4  | 326  | 0.48     | [0.14, 0.81]  | 0              | NA          | NA  |
| Anheyer (2017)        | passive    | pain-related disability                    | post      | 4  | 326  | 0.38     | [-0.04, 0.81] | 0              | NA          | NA  |
| Anheyer (2019)        | passive    | mindfulness                                | post      | 4  | 157  | 0.24     | [-0.08, 0.55] | 0              | NA          | NA  |
| Anheyer (2019)        | passive    | pain intensity                             | post      | 5  | 195  | 0.78     | [0.11, 1.45]  | 79             | NA          | NA  |
| Bawa (2015)           | passive    | pain intensity                             | post      | 4  | 104  | 0.38     | [-0.01, 0.78] | 0              | NA          | NA  |
| Bawa (2015)           | active     | pain intensity                             | post      | 5  | 349  | 0.09     | [-0.13, 0.31] | 0              | NA          | NA  |
| Bohlmeijer (2010)     | passive    | anxiety                                    | post      | 4  | 348  | 0.47     | [0.11, 0.83]  | 53.95          | NA          | NA  |
| Chen (2019)           | passive    | depression                                 | post      | 4  | 624  | 0.39     | [0.09, 0.68]  | 41             | NA          | NA  |
| Chiesa (2011)         | passive    | depression                                 | FU        | 4  | 326  | 0.66     | [0.32, 0.98]  | 39             | no evidence | NA  |
| Cillessen (2019)      | active     | psychological distress                     | post      | 4  | 410  | 0.09     | [-0.11, 0.28] | 0              | NA          | NA  |
| Cillessen (2019)      | active     | psychological distress                     | post      | 5  | 518  | 0.15     | [-0.02, 0.32] | 0              | NA          | NA  |
| Cillessen (2019)      | active     | psychological distress                     | FU        | 7  | 772  | 0.01     | [-0.14, 0.15] | 0              | NA          | NA  |
| Cillessen (2019)      | passive    | psychological distress                     | FU        | 11 | 1435 | 0.3      | [0.14, 0.45]  | 46.1           | no evidence | 74  |
| Cillessen (2019)      | passive    | psychological distress                     | post      | 20 | 2346 | 0.4      | [0.29, 0.52]  | 38.9           | no evidence | 431 |
| Cuijpers (2019)       | passive    | depression                                 | post      | 4  | NA   | 0.49     | [0.27, 0.71]  | 0              | NA          | NA  |
| de Abreu Costa (2019) | active     | internalizing symptoms                     | post      | 4  | 275  | 0.17     | [-0.06, 0.39] | 39.15          | no evidence | NA  |
| Demarzo (2015)        | active     | combined mental health and quality of life | post      | 4  | NA   | -0.22    | [-0.92, 0.48] | 89             | NA          | NA  |
| Demarzo (2015)        | passive    | combined mental health and quality of life | post      | 4  | NA   | 1.22     | [0.36, 2.07]  | 90             | NA          | NA  |
| Dunning (2019)        | passive    | all measures                               | post      | 8  | 578  | 0.38     | [0.24, 0.51]  | 61.5           | NA          | NA  |
| Dunning (2019)        | active     | all measures                               | post      | 9  | 813  | 0.26     | [0.15, 0.37]  | 64.57          | NA          | NA  |

Running head: EMPIRICAL STATUS OF MINDFULNESS

|                 |         |                      |      |    |      |        |               |       |                        |    |
|-----------------|---------|----------------------|------|----|------|--------|---------------|-------|------------------------|----|
| Dunning (2019)  | active  | all measures         | post | 11 | 1136 | 0.15   | [0.09, 0.22]  | 65.46 | NA                     | NA |
| Dunning (2019)  | passive | all measures         | post | 11 | 1501 | 0.1    | [0.04, 0.16]  | 67.99 | NA                     | NA |
| Dunning (2019)  | active  | attention            | post | 5  | 787  | 0.13   | [-0.01, 0.28] | 0     | no evidence            | NA |
| Dunning (2019)  | active  | anxiety/stress       | post | 9  | 844  | 0.18   | [0.05, 0.31]  | 0     | no evidence            | NA |
| Dunning (2019)  | active  | executive functions  | post | 7  | 958  | 0.1    | [-0.03, 0.23] | 5.1   | no evidence            | NA |
| Dunning (2019)  | active  | depression           | post | 6  | 520  | 0.47   | [0.22, 0.72]  | 28.92 | no evidence            | NA |
| Dunning (2019)  | active  | all measures         | post | 17 | 1762 | 0.2    | [0.14, 0.26]  | 67.08 | no evidence            | NA |
| Dunning (2019)  | active  | negative behavior    | post | 5  | 580  | 0.22   | [-0.16, 0.59] | 74.79 | no evidence            | NA |
| Dunning (2019)  | active  | social behavior      | post | 6  | 708  | -0.07  | [-0.46, 0.31] | 79.14 | no evidence            | NA |
| Dunning (2019)  | active  | mindfulness          | post | 6  | 600  | 0.42   | [0.16, 0.67]  | 44.9  | yes, unclear direction | NA |
| Galante (2013)  | passive | depression relapse   | FU   | 4  | 307  | 0.65   | [0.38, 0.89]  | 0     | no evidence            |    |
| Goldberg (2018) | active  | weight/eating        | post | 5  | 437  | 0.08   | [-0.24, 0.39] | 0     | no evidence            | NA |
| Goldberg (2018) | active  | depression           | FU   | 7  | 1064 | 0.04   | [-0.13, 0.20] | 0     | no evidence            | NA |
| Goldberg (2018) | active  | anxiety              | post | 5  | 374  | 0.15   | [-0.16, 0.46] | 15    | no evidence            | NA |
| Goldberg (2018) | active  | addiction            | post | 7  | 900  | 0.27   | [0.02, 0.53]  | 18    | no evidence            | NA |
| Goldberg (2018) | passive | schizophrenia        | post | 7  | 456  | 0.5    | [0.23, 0.76]  | 46    | no evidence            | NA |
| Goldberg (2018) | passive | depression           | FU   | 12 | 2369 | 0.55   | [0.25, 0.84]  | 60    | no evidence            | NA |
| Goldberg (2018) | passive | addiction            | post | 5  | 149  | 0.35   | [-0.06, 0.76] | 69    | no evidence            | NA |
| Goldberg (2018) | active  | depression           | post | 9  | 762  | 0.38   | [0.12, 0.64]  | 72    | no evidence            | NA |
| Goldberg (2018) | active  | addiction            | FU   | 4  | 900  | 0.38   | [0.00, 0.76]  | 73    | no evidence            | NA |
| Goldberg (2018) | active  | weight/eating        | FU   | 5  | 437  | 0.18   | [-0.16, 0.53] | 74    | no evidence            | NA |
| Goldberg (2018) | active  | pain                 | post | 9  | 946  | 0.03   | [-0.20, 0.26] | 79    | no evidence            | NA |
| Goldberg (2018) | passive | anxiety              | post | 8  | 472  | 0.89   | [0.62, 1.17]  | 81    | no evidence            | NA |
| Goldberg (2018) | passive | weight/eating        | post | 5  | 226  | 0.79   | [0.44, 1.15]  | 82    | no evidence            | NA |
| Goldberg (2018) | active  | depression           | FU   | 6  | 762  | 0.35   | [0.04, 0.67]  | 83    | no evidence            | NA |
| Goldberg (2018) | active  | psychiatric symptoms | post | 9  | 410  | 0.35   | [0.09, 0.62]  | 62    | no evidence            | NA |
| Goldberg (2018) | active  | psychiatric symptoms | post | 28 | 2806 | -0.004 | [-0.15, 0.14] | 65    | no evidence            | NA |



## Running head: EMPIRICAL STATUS OF MINDFULNESS

|                  |         |                      |      |    |      |       |               |       |                            |    |
|------------------|---------|----------------------|------|----|------|-------|---------------|-------|----------------------------|----|
| Goldberg (2018)  | active  | psychiatric symptoms | FU   | 29 | 3810 | 0.29  | [0.13, 0.45]  | 72    | no evidence                | NA |
| Goldberg (2018)  | passive | psychiatric symptoms | FU   | 37 | 5748 | 0.5   | [0.36, 0.65]  | 80    | no evidence                | NA |
| Goldberg (2018)  | active  | depression           | post | 10 | 1064 | -0.01 | [-0.19, 0.16] | 0     | yes, effect size increased | NA |
| Goldberg (2018)  | active  | anxiety              | post | 5  | 362  | -0.18 | [-0.41, 0.06] | 38    | yes, effect size increased | NA |
| Goldberg (2018)  | active  | pain                 | FU   | 8  | 946  | 0.18  | [-0.07, 0.44] | 51    | yes, effect size increased | NA |
| Goldberg (2018)  | active  | psychiatric symptoms | FU   | 4  | 557  | 0.38  | [-0.05, 0.82] | 12    | yes, effect size increased | NA |
| Goldberg (2018)  | active  | psychiatric symptoms | post | 4  | 557  | 0.37  | [0.03, 0.71]  | 33    | yes, effect size increased | NA |
| Goldberg (2018)  | active  | psychiatric symptoms | FU   | 4  | 410  | 0.52  | [0.05, 0.99]  | 73    | yes, effect size increased | NA |
| Goldberg (2018)  | active  | smoking cessation    | post | 4  | 587  | 0.42  | [0.20, 0.64]  | 11    | yes, effect size reduced   | NA |
| Goldberg (2018)  | passive | depression           | post | 30 | 2369 | 0.59  | [0.46, 0.73]  | 35    | yes, effect size reduced   | NA |
| Goldberg (2018)  | passive | pain                 | post | 24 | 1534 | 0.45  | [0.30, 0.60]  | 46    | yes, effect size reduced   | NA |
| Goldberg (2018)  | passive | pain                 | FU   | 12 | 1534 | 0.48  | [0.19, 0.78]  | 54    | yes, effect size reduced   | NA |
| Goldberg (2018)  | active  | psychiatric symptoms | FU   | 15 | 2806 | 0.09  | [-0.14, 0.33] | 67    | yes, effect size reduced   | NA |
| Goldberg (2018)  | passive | schizophrenia        | FU   | 4  | 456  | 1.18  | [0.71, 1.65]  | 97    | yes, effect size reduced   | NA |
| Goldberg (2018)  | passive | psychiatric symptoms | post | 89 | 5748 | 0.55  | [0.47, 0.63]  | 58    | yes, effect size reduced   | NA |
| Goldberg (2018)  | active  | psychiatric symptoms | post | 42 | 3810 | 0.23  | [0.12, 0.34]  | 61    | yes, effect size reduced   | NA |
| Goldberg (2019a) | active  | depression           | post | 6  | 447  | 0.002 | [-0.43, 0.44] | 65.34 | no evidence                | 0  |
| Goldberg (2019a) | active  | depression           | FU   | 4  | 324  | 0.26  | [-0.24, 0.75] | 59.31 | yes, effect size reduced   | 1  |
| Goldberg (2019b) | active  | psychiatric symptoms | FU   | 19 | 2020 | 0.18  | [0.06, 0.30]  | 42.71 | no evidence                | NA |
| Goldberg (2019b) | active  | mindfulness          | post | 30 | 2863 | 0.25  | [0.11, 0.38]  | 59.85 | no evidence                | NA |

Running head: EMPIRICAL STATUS OF MINDFULNESS

|                  |         |                      |      |    |      |       |               |       |                            |    |
|------------------|---------|----------------------|------|----|------|-------|---------------|-------|----------------------------|----|
| Goldberg (2019b) | passive | psychiatric symptoms | FU   | 6  | 296  | 0.27  | [-0.14, 0.67] | 70.34 | no evidence                | NA |
| Goldberg (2019b) | active  | psychiatric symptoms | post | 30 | 2863 | 0.16  | [0.07, 0.24]  | 18.67 | yes, effect size increased | NA |
| Goldberg (2019b) | passive | mindfulness          | post | 25 | 1415 | 0.52  | [0.40, 0.64]  | 17.45 | yes, effect size reduced   | NA |
| Goldberg (2019b) | passive | mindfulness          | FU   | 5  | 234  | 0.52  | [0.20, 0.84]  | 21.65 | yes, effect size reduced   | NA |
| Goldberg (2019b) | passive | psychiatric symptoms | post | 25 | 1415 | 0.37  | [0.25, 0.50]  | 36.34 | yes, effect size reduced   | NA |
| Goldberg (2019b) | active  | mindfulness          | FU   | 13 | 1430 | 0.1   | [-0.08, 0.28] | 58.54 | yes, effect size reduced   | NA |
| Goldberg (2020)  | active  | psychiatric symptoms | post | 58 | 5627 | 0.13  | [0.03, 0.23]  | 69.7  | NA                         | NA |
| Goyal (2014)     | active  | pain                 | post | 4  | 341  | 0.33  | [0.03, 0.62]  | NA    | NA                         | NA |
| Goyal (2014)     | active  | anxiety              | post | 8  | 647  | 0.38  | [0.12, 0.64]  | NA    | NA                         | NA |
| Goyal (2014)     | active  | depression           | post | 10 | 806  | 0.3   | [0.00, 0.59]  | NA    | NA                         | NA |
| Goyal (2014)     | active  | anxiety              | FU   | NA | NA   | 0.22  | [0.02, 0.43]  | NA    | NA                         | NA |
| Goyal (2014)     | active  | depression           | FU   | NA | NA   | 0.23  | [0.05, 0.42]  | NA    | NA                         | NA |
| Halladay (2019)  | active  | depression           | post | 9  | 830  | -0.04 | [-0.22, 0.13] | 29    | NA                         | NA |
| Halladay (2019)  | active  | anxiety              | post | 7  | 663  | -0.13 | [-0.34, 0.08] | 39    | NA                         | NA |
| Halladay (2019)  | active  | stress               | post | 6  | 605  | 0.08  | [-0.16, 0.30] | 47    | NA                         | NA |
| Halladay (2019)  | passive | depression           | post | 20 | 1266 | 0.49  | [0.30, 0.68]  | 59    | NA                         | NA |
| Haller (2017)    | passive | sleep                | post | 4  | 504  | 0.23  | [0.05, 0.40]  | 0     | NA                         | NA |
| Haller (2017)    | passive | fatigue              | post | 5  | 764  | 0.28  | [0.14, 0.43]  | 0     | NA                         | NA |
| Haller (2017)    | passive | anxiety              | post | 9  | 1314 | 0.28  | [0.16, 0.39]  | 6     | NA                         | NA |
| Haller (2017)    | passive | depression           | post | 8  | 1249 | 0.34  | [0.21, 0.46]  | 16    | NA                         | NA |
| Haller (2017)    | passive | anxiety              | FU   | 5  | 778  | 0.28  | [0.09, 0.47]  | 35    | NA                         | NA |
| Haller (2017)    | passive | quality of life      | post | 7  | 958  | 0.21  | [0.04, 0.39]  | 41    | NA                         | NA |
| Haller (2017)    | passive | depression           | FU   | 4  | 722  | 0.26  | [0.04, 0.47]  | 45    | NA                         | NA |
| Haller (2017)    | passive | stress               | post | 5  | 619  | 0.33  | [0.05, 0.61]  | 60    | NA                         | NA |

## Running head: EMPIRICAL STATUS OF MINDFULNESS

|                        |         |                             |      |    |      |       |               |       |                          |     |
|------------------------|---------|-----------------------------|------|----|------|-------|---------------|-------|--------------------------|-----|
| Hedman-Lagerlöf (2018) | active  | psychiatric symptoms        | post | 6  | NA   | 0.17  | [-0.05, 0.39] | 33    | no evidence              | NA  |
| Hedman-Lagerlöf (2018) | active  | psychiatric symptoms        | post | 5  | NA   | 0.18  | [-0.20, 0.56] | 54    | no evidence              | NA  |
| Hedman-Lagerlöf (2018) | passive | psychiatric symptoms        | post | 6  | NA   | 0.4   | [0.19, 0.61]  | 0     | yes, effect size reduced | NA  |
| Hedman-Lagerlöf (2018) | active  | psychiatric symptoms        | post | 8  | NA   | -0.01 | [-0.35, 0.33] | 64    | yes, effect size reduced | NA  |
| Khoo (2019)            | passive | depression                  | post | 6  | 658  | 0.49  | [0.24, 0.74]  | 59.06 | NA                       | NA  |
| Khoo (2019)            | passive | physical functioning        | post | 5  | 566  | 0.38  | [0.09, 0.68]  | 62.45 | NA                       | NA  |
| Khoo (2019)            | passive | pain intensity              | post | 5  | 418  | 0.33  | [-0.09, 0.74] | 78.53 | NA                       | NA  |
| Khoo (2019)            | active  | depression                  | post | 14 | 1163 | 0.24  | [-0.59, 1.95] | NA    | NA                       | NA  |
| Khoo (2019)            | active  | physical functioning        | post | 15 | 1177 | -0.02 | [-0.83, 0.65] | NA    | NA                       | NA  |
| Khoo (2019)            | active  | pain intensity              | post | 17 | 1221 | 0.02  | [-0.53, 0.59] | NA    | NA                       | NA  |
| Kuyken (2016)          | active  | depression relapse          | FU   | 4  | 637  | 0.17  | [0.01, 0.35]  | 0     | NA                       | NA  |
| Kuyken (2016)          | active  | depression relapse          | FU   | 5  | 892  | 0.16  | [0.01, 0.31]  | 0     | NA                       | NA  |
| Lenz (2016)            | active  | depression                  | FU   | 7  | NA   | 0.16  | [0.01, 0.30]  | 0     | NA                       | 12  |
| Lenz (2016)            | passive | depression                  | FU   | 4  | NA   | 0.97  | [0.26, 1.68]  | 88.24 | NA                       | 66  |
| Lenz (2016)            | active  | depression                  | post | 16 | NA   | 0.54  | [0.36, 0.73]  | 46.15 | NA                       | 376 |
| Lenz (2016)            | passive | depression                  | post | 16 | NA   | 0.76  | [0.56, 0.95]  | 51.08 | NA                       | 722 |
| Li (2017)              | active  | craving                     | post | 6  | 627  | 0.63  | [0.08, 1.17]  | NA    | NA                       | NA  |
| Li (2017)              | active  | smoking cessation           | post | 4  | 473  | 0.31  | [-0.01, 0.63] | 34.5  | yes, effect size reduced | NA  |
| Li (2017)              | active  | substance misuse            | post | 6  | 700  | 0.33  | [0.17, 0.49]  | 5     | yes, unclear direction   | NA  |
| Li (2019)              | passive | depression                  | post | 4  | 330  | 0.74  | [-0.20, 1.68] | 92    | NA                       | NA  |
| Linardon (2019)        | passive | disordered eating behaviors | post | 4  | NA   | 0.29  | [-0.13, 0.71] | NA    | NA                       | NA  |
| Linardon (2019)        | passive | body image concerns         | post | 6  | NA   | 0.08  | [-0.01, 0.16] | NA    | NA                       | NA  |
| Martin (2018)          | active  | depression                  | post | 4  | 386  | 0.32  | [-0.01, 0.66] | 63    | NA                       | NA  |

Running head: EMPIRICAL STATUS OF MINDFULNESS

|                 |         |                          |      |   |      |       |               |       |                          |    |
|-----------------|---------|--------------------------|------|---|------|-------|---------------|-------|--------------------------|----|
| Norman (2019)   | passive | alexithymia              | FU   | 4 | 435  | 0.48  | [0.15, 0.81]  | 42    | NA                       | NA |
| Norman (2019)   | passive | alexithymia              | post | 4 | 441  | 0.38  | [0.00, 0.76]  | 56    | NA                       | NA |
| Pascoe (2017)   | active  | IL-6                     | post | 4 | 98   | 0.04  | [-0.02, 0.12] | 0     | NA                       | NA |
| Pascoe (2017)   | active  | resting heart rate       | post | 5 | 240  | 0.26  | [0.01, 0.52]  | 0     | NA                       | NA |
| Pascoe (2017)   | active  | c-reactive protein       | post | 5 | 298  | 0.16  | [-0.07, 0.39] | 0     | NA                       | NA |
| Pascoe (2017)   | active  | ambulatory heart rate    | post | 4 | 310  | 0.16  | [-0.06, 0.38] | 0     | NA                       | NA |
| Pascoe (2017)   | active  | diastolic blood pressure | post | 5 | 359  | 0.11  | [-0.10, 0.32] | 0     | NA                       | NA |
|                 |         |                          |      |   |      |       |               |       |                          |    |
| Pascoe (2017)   | active  | systolic blood pressure  | post | 5 | 359  | 0.22  | [-0.03, 0.47] | 36.65 | NA                       | NA |
| Phillips (2019) | passive | mindfulness              | post | 4 | NA   | 0.43  | [0.20, 0.66]  | 17.14 | NA                       | NA |
| Piet (2011)     | passive | depression               | FU   | 4 | 302  | 0.63  | [0.37, 0.89]  | 12    | NA                       | NA |
| Piet (2011)     | passive | depression               | FU   | 4 | 352  | 0.45  | [0.21, 0.68]  | 24    | NA                       | NA |
| Piet (2012)     | passive | depression               | FU   | 4 | 576  | 0.19  | [0.03, 0.36]  | 0     | NA                       | 1  |
| Piet (2012)     | passive | anxiety                  | FU   | 4 | 581  | 0.26  | [0.10, 0.42]  | 0     | NA                       | 4  |
| Piet (2012)     | passive | mindfulness              | post | 5 | 513  | 0.39  | [0.20, 0.58]  | 9     | NA                       | 21 |
| Piet (2012)     | passive | depression               | post | 9 | 955  | 0.44  | [0.24, 0.64]  | 51    | no evidence              | 82 |
| Piet (2012)     | passive | anxiety                  | post | 9 | 959  | 0.37  | [0.24, 0.50]  | 0     | yes, effect size reduced | 66 |
| Rusch (2019)    | active  | sleep quality            | FU   | 4 | 527  | -0.14 | [-0.62, 0.34] | 84    | NA                       | NA |
| Rusch (2019)    | active  | sleep quality            | post | 7 | 716  | -0.03 | [-0.49, 0.43] | 88    | NA                       | NA |
| Sanada (2016)   | passive | cortisol                 | post | 4 | 115  | 0.48  | [-0.39, 1.35] | 79    | NA                       | NA |
| Schell (2019)   | passive | sleep                    | post | 4 | 475  | 0.38  | [-0.04, 0.79] | NA    | NA                       | NA |
| Schell (2019)   | passive | fatigue                  | FU   | 4 | 607  | 0.31  | [-0.23, 0.84] | NA    | NA                       | NA |
| Schell (2019)   | passive | sleep                    | FU   | 4 | 654  | 0.27  | [-0.08, 0.63] | NA    | NA                       | NA |
| Schell (2019)   | passive | fatigue                  | post | 5 | 693  | 0.5   | [0.14, 0.86]  | NA    | NA                       | NA |
| Schell (2019)   | passive | depression               | post | 6 | 745  | 0.54  | [0.22, 0.86]  | NA    | NA                       | NA |
| Schell (2019)   | passive | anxiety                  | post | 6 | 749  | 0.29  | [0.08, 0.50]  | NA    | NA                       | NA |
| Schell (2019)   | passive | anxiety                  | FU   | 7 | 1094 | 0.28  | [0.07, 0.49]  | NA    | NA                       | NA |

## Running head: EMPIRICAL STATUS OF MINDFULNESS

|                   |         |                        |      |    |      |       |               |       |                          |    |
|-------------------|---------|------------------------|------|----|------|-------|---------------|-------|--------------------------|----|
| Schell (2019)     | passive | depression             | FU   | 7  | 1097 | 0.32  | [0.06, 0.58]  | NA    | NA                       | NA |
| Spijkerman (2016) | passive | stress                 | post | 7  | 1174 | 0.54  | [0.27, 0.82]  | 85.18 | NA                       | NA |
| Spinelli (2019)   | passive | mindfulness            | FU   | 7  | NA   | 0.34  | [0.17, 0.52]  | 0     | NA                       | NA |
| Spinelli (2019)   | active  | overall                | post | 9  | NA   | 0.22  | [0.03, 0.42]  | 0     | NA                       | NA |
| Stratton (2017)   | passive | stress                 | FU   | 4  | 215  | 0.32  | [-0.09, 0.73] | 0     | NA                       | NA |
| Strauss (2014)    | active  | depression, anxiety    | post | 5  | 211  | -0.03 | [-0.54, 0.48] | 68    | NA                       | NA |
| Strauss (2014)    | passive | depression, anxiety    | post | 7  | 367  | 1.03  | [0.40, 1.66]  | 87    | NA                       | NA |
| Teleki (2010)     | passive | psychological outcomes | post | 6  | 197  | 0.66  | [0.37, 0.96]  | NA    | NA                       | NA |
| Teleki (2010)     | passive | psychological outcomes | post | 5  | 320  | 0.34  | [0.11, 0.57]  | NA    | NA                       | NA |
| Teleki (2010)     | passive | psychological outcomes | post | 12 | 613  | 0.54  | [0.33, 0.75]  | NA    | yes, effect size reduced | NA |
| Visted (2015)     | active  | mindfulness            | post | 12 | NA   | 0.1   | [-0.05, 0.26] | NA    | NA                       | NA |
| Visted (2015)     | passive | mindfulness            | post | 16 | NA   | 0.47  | [0.23, 0.70]  | NA    | NA                       | NA |
| Wang (2018)       | active  | depression             | post | 8  | 475  | 0.24  | [-0.16, 0.64] | 75    | no evidence              | NA |
| Wang (2018)       | passive | depression             | post | 4  | 247  | 1.27  | [0.66, 1.88]  | 77    | yes, unclear direction   | NA |
| Zhang (2015)      | passive | anxiety                | post | 4  | 406  | 0.25  | [-0.28, 0.77] | 0     | NA                       | NA |
| Zhang (2015)      | passive | depression             | post | 4  | 406  | 0.6   | [0.38, 0.81]  | 0     | NA                       | NA |
| Zhang (2015)      | passive | anxiety                | post | 4  | 520  | 1     | [-0.04, 2.03] | 95.86 | NA                       | NA |
| Zhang (2015)      | passive | depression             | post | 4  | 520  | 1.05  | [-0.22, 2.31] | 97.13 | NA                       | NA |
| Zhang (2016)      | passive | anxiety                | post | 4  | 681  | 0.31  | [0.16, 0.46]  | 18    | NA                       | NA |
| Zhang (2016)      | passive | depression             | post | 5  | 737  | 1.13  | [0.41, 1.85]  | 95    | NA                       | NA |

Note: ES = effect size; CI = confidence interval; FSN = fail-safe N; NA = not available; FU = follow-up; k = number of studies; n = number of participants.

Running head: EMPIRICAL STATUS OF MINDFULNESS

Supplemental Materials Table 4. PICOS subcategories

| PICOS category | Subcategory                                | Description in meta-analyses                                                                                                                                                                                                                                                                                                                                                  |
|----------------|--------------------------------------------|-------------------------------------------------------------------------------------------------------------------------------------------------------------------------------------------------------------------------------------------------------------------------------------------------------------------------------------------------------------------------------|
| Population     | Children                                   | Children/adolescents                                                                                                                                                                                                                                                                                                                                                          |
| Population     | Adults                                     | Adults, employees, healthcare professionals, healthy adults, non-clinical community volunteers, nursing or allied health care students, older adults, post-secondary students                                                                                                                                                                                                 |
| Population     | Older adults                               | Older adults                                                                                                                                                                                                                                                                                                                                                                  |
| Population     | Employees                                  | Employees, healthcare professionals                                                                                                                                                                                                                                                                                                                                           |
| Population     | Healthcare workers and healthcare trainees | Healthcare professionals, nursing or allied health care students                                                                                                                                                                                                                                                                                                              |
| Population     | Students                                   | Nursing or allied health care students, post-secondary students                                                                                                                                                                                                                                                                                                               |
| Problem        | Psychiatric condition                      | Addiction, anxiety, anxiety disorders, chronic headache, chronic pain, common psychiatric conditions, depression, depression, anxiety, depression with three or more previous episodes, depression, anxiety, low back pain, pain, psychiatric conditions, schizophrenia, sleep disturbance, smoking, substance misuse, various psychiatric disorders, weight/eating disorders |
| Problem        | Physical health condition                  | Chronic medical disease, breast cancer, cancer, chronic headache, chronic pain, low back pain, medical diagnoses, mixed cancer, pain, weight/eating                                                                                                                                                                                                                           |
| Problem        | Cancer                                     | Breast cancer, cancer, mixed cancer                                                                                                                                                                                                                                                                                                                                           |
| Problem        | Pain conditions                            | Chronic headache, chronic pain, pain, low back pain                                                                                                                                                                                                                                                                                                                           |
| Problem        | Eating and weight-related conditions       | Weight/eating disorders                                                                                                                                                                                                                                                                                                                                                       |
| Problem        | Schizophrenia and psychotic disorders      | Schizophrenia                                                                                                                                                                                                                                                                                                                                                                 |
| Problem        | Anxiety                                    | Anxiety, anxiety disorders                                                                                                                                                                                                                                                                                                                                                    |
| Problem        | Depression                                 | Depression, depression in remission, depression with three or more previous episodes                                                                                                                                                                                                                                                                                          |
| Problem        | Depression in remission                    | Depression in remission                                                                                                                                                                                                                                                                                                                                                       |

## Running head: EMPIRICAL STATUS OF MINDFULNESS

---

|              |                          |                                                                                                                                                                                                                                                                                                                                              |
|--------------|--------------------------|----------------------------------------------------------------------------------------------------------------------------------------------------------------------------------------------------------------------------------------------------------------------------------------------------------------------------------------------|
| Problem      | Substance use            | Addiction, substance misuse                                                                                                                                                                                                                                                                                                                  |
| Problem      | Smoking                  | Smoking                                                                                                                                                                                                                                                                                                                                      |
| Intervention | MBIs                     | various MBIs                                                                                                                                                                                                                                                                                                                                 |
| Intervention | MBSR                     | MBSR                                                                                                                                                                                                                                                                                                                                         |
| Intervention | MBCT                     | MBCT                                                                                                                                                                                                                                                                                                                                         |
| Intervention | MBSR/MBCT                | MBSR/MBCT                                                                                                                                                                                                                                                                                                                                    |
| Intervention | mHealth                  | e-health MBIs, online MBIs, self-help MBIs                                                                                                                                                                                                                                                                                                   |
| Comparison   | Passive                  | Waitlist, no treatment, treatment-as-usual, usual care                                                                                                                                                                                                                                                                                       |
| Comparison   | Active                   | Antidepressants, attention placebo, bona fide treatment comparison, CBT, competing intervention, placebo                                                                                                                                                                                                                                     |
| Comparison   | Specific active          | Antidepressants, bona fide treatment comparison, CBT, competing intervention                                                                                                                                                                                                                                                                 |
| Comparison   | Evidence-based treatment | Antidepressants, CBT                                                                                                                                                                                                                                                                                                                         |
| Outcome      | Psychological symptoms   | Addiction, anxiety, anxiety/stress, body image concerns, craving, depression, depression, anxiety, depression relapse, disordered eating behaviors, internalizing symptoms, negative behavior, psychiatric symptoms, psychological distress, schizophrenia, sleep, sleep quality, smoking cessation, stress, substance misuse, weight/eating |
| Outcome      | Stress                   | Anxiety/stress, psychological distress, stress                                                                                                                                                                                                                                                                                               |
| Outcome      | Physical health symptoms | Pain, pain intensity, pain-related disability, physical functioning, sleep, sleep quality                                                                                                                                                                                                                                                    |
| Outcome      | Physiology               | C-reactive protein, diastolic blood pressure, IL-6, resting heart rate, ambulatory heart rate, systolic blood pressure                                                                                                                                                                                                                       |
| Outcome      | Well-being               | Quality of life                                                                                                                                                                                                                                                                                                                              |
| Outcome      | Mindfulness              | Mindfulness                                                                                                                                                                                                                                                                                                                                  |
| Outcome      | Objective measures       | Ambulatory heart rate, attention, c-reactive protein, cortisol, diastolic blood pressure, executive functions, IL-6, resting heart rate, systolic blood pressure                                                                                                                                                                             |
| Outcome      | Sleep                    | Sleep, sleep quality, total sleep time                                                                                                                                                                                                                                                                                                       |

---

Running head: EMPIRICAL STATUS OF MINDFULNESS

Note: CBT = cognitive behavior therapy; IL-6 = interleukin-6; MBI = mindfulness-based intervention; MBSR = mindfulness-based stress reduction; MBCT = mindfulness-based cognitive therapy.



## Running head: EMPIRICAL STATUS OF MINDFULNESS

Supplemental Materials Table 5. Post-treatment comparisons with specific active controls across PICOS

| PICOS      | Subcategory   | k <sub>all</sub> | ES <sub>all</sub> | ES <sub>all</sub> Min | ES <sub>all</sub> Max | Rep Study        | k <sub>rep</sub> | n <sub>rep</sub> | ES <sub>rep</sub> | 95% CI <sub>rep</sub> | I <sup>2</sup> <sub>rep</sub> |
|------------|---------------|------------------|-------------------|-----------------------|-----------------------|------------------|------------------|------------------|-------------------|-----------------------|-------------------------------|
| Population | Children      | 1                | 1                 | 0.26                  | 0.26                  | Dunning (2019)   | 9                | 813              | 0.26              | 0.15, 0.37            | 64.57                         |
| Population | Adults        | 13               | 28                | -0.18                 | 0.63                  | Goldberg (2020)  | 58               | 5627             | 0.13              | 0.03, 0.23            | 69.7                          |
| Population | Older adults  | NA               | NA                | NA                    | NA                    | NA               | NA               | NA               | NA                | NA                    | NA                            |
| Population | Employees     | 1                | 1                 | 0.22                  | 0.22                  | Spinelli (2019)  | 9                | NA               | 0.22              | 0.03, 0.42            | 0                             |
| Population | Healthcare    | 1                | 1                 | 0.22                  | 0.22                  | Spinelli (2019)  | 9                | NA               | 0.22              | 0.03, 0.42            | 0                             |
| Population | Students      | NA               | NA                | NA                    | NA                    | NA               | NA               | NA               | NA                | NA                    | NA                            |
| Problem    | Psychiatric   | 12               | 27                | -0.18                 | 0.63                  | Goldberg (2020)  | 58               | 5627             | 0.13              | 0.03, 0.23            | 69.7                          |
| Problem    | Physical      | 3                | 6                 | -0.02                 | 0.24                  | Khoo (2019)      | 17               | 1221             | 0.02              | -0.53, 0.59           | NA                            |
| Problem    | Cancer        | 1                | 1                 | 0.09                  | 0.09                  | Cillessen (2019) | 4                | 410              | 0.09              | -0.11, 0.28           | 0                             |
| Problem    | Pain          | 2                | 4                 | -0.02                 | 0.24                  | Khoo (2019)      | 17               | 1221             | 0.02              | -0.53, 0.59           | NA                            |
| Problem    | Weight/eating | 1                | 1                 | 0.08                  | 0.08                  | Goldberg (2018)  | 5                | 437              | 0.08              | -0.24, 0.39           | 0                             |
| Problem    | Psychotic     | NA               | NA                | NA                    | NA                    | NA               | NA               | NA               | NA                | NA                    | NA                            |
| Problem    | Anxiety       | 2                | 3                 | -0.18                 | 0.17                  | Goldberg (2018)  | 5                | 362              | -0.18             | -0.41, 0.06           | 38                            |
| Problem    | Depression    | 4                | 5                 | -0.01                 | 0.54                  | Lenz (2016)      | 16               | NA               | 0.54              | 0.36, 0.73            | 46.15                         |
| Problem    | MDD relapse   | NA               | NA                | NA                    | NA                    | NA               | NA               | NA               | NA                | NA                    | NA                            |
| Problem    | Substance use | 2                | 4                 | 0.27                  | 0.63                  | Goldberg (2018)  | 7                | 900              | 0.27              | 0.02, 0.53            | 18                            |
| Problem    | Smoking       | 1                | 1                 | 0.42                  | 0.42                  | Goldberg (2018)  | 4                | 587              | 0.42              | 0.20, 0.64            | 11                            |
| Interv     | Various MBIs  | 12               | 25                | -0.18                 | 0.63                  | Goldberg (2020)  | 58               | 5627             | 0.13              | 0.03, 0.23            | 69.7                          |
| Interv     | MBSR          | 1                | 3                 | -0.02                 | 0.24                  | Khoo (2019)      | 17               | 1221             | 0.02              | -0.53, 0.59           | NA                            |
| Interv     | MBCT          | 2                | 2                 | 0.002                 | 0.54                  | Lenz (2016)      | 16               | NA               | 0.54              | 0.36, 0.73            | 46.15                         |
| Interv     | MBSR/MBCT     | 4                | 6                 | -0.02                 | 0.54                  | Khoo (2019)      | 17               | 1221             | 0.02              | -0.53, 0.59           | NA                            |
| Interv     | mHealth       | 1                | 1                 | 0.32                  | 0.32                  | Martin (2018)    | 4                | 386              | 0.32              | -0.01, 0.66           | 63                            |
| Outcome    | Psych sx      | 14               | 25                | -0.18                 | 0.63                  | Goldberg (2020)  | 58               | 5627             | 0.13              | 0.03, 0.23            | 69.7                          |
| Outcome    | Stress        | 1                | 1                 | 0.09                  | 0.09                  | Cillessen (2019) | 4                | 410              | 0.09              | -0.11, 0.28           | 0                             |
| Outcome    | Phys sx       | 3                | 4                 | -0.03                 | 0.03                  | Khoo (2019)      | 17               | 1221             | 0.02              | -0.53, 0.59           | NA                            |
| Outcome    | Physiology    | NA               | NA                | NA                    | NA                    | NA               | NA               | NA               | NA                | NA                    | NA                            |
| Outcome    | Well-being    | NA               | NA                | NA                    | NA                    | NA               | NA               | NA               | NA                | NA                    | NA                            |

Running head: EMPIRICAL STATUS OF MINDFULNESS

|         |             |    |    |       |       |                  |    |      |       |             |       |
|---------|-------------|----|----|-------|-------|------------------|----|------|-------|-------------|-------|
| Outcome | Mindfulness | 2  | 2  | 0.1   | 0.25  | Goldberg (2019b) | 30 | 2863 | 0.25  | 0.11, 0.38  | 59.85 |
| Outcome | Objective   | NA | NA | NA    | NA    | NA               | NA | NA   | NA    | NA          | NA    |
| Outcome | Sleep       | 1  | 1  | -0.03 | -0.03 | Rusch (2019)     | 7  | 716  | -0.03 | -0.49, 0.43 | 88    |

Note: PICOS = populations, problems, interventions, comparisons, outcomes, and study design; Subcategory = PICOS subcategory;  $k_{all}$  = number of meta-analyses providing effect size for PICOS subcategory; Min = minimum effect size for subcategory;  $ES_{all}$  Max = maximum effect size for subcategory; Rep Study = meta-analysis that included the effect size based on the largest number of studies for PICOS subcategory;  $k_{rep}$  = number of studies in representative effect size;  $n_{rep}$  = number of participants for representative effect size;  $ES_{rep}$  = representative effect size; 95%  $CI_{rep}$  = confidence interval for representative effect size;  $I^2_{rep}$  = heterogeneity for representative effect size; NA = not available; sx = symptoms; MDD = major depressive disorder; MBI = mindfulness-based intervention; MBSR = mindfulness-based stress reduction; MBCT = mindfulness-based cognitive therapy; mHealth = mobile health; Phys = physical; Psych = psychiatric; Interv = intervention.

## Running head: EMPIRICAL STATUS OF MINDFULNESS

Supplemental Materials Table 6. Follow-up comparisons with specific active controls across PICOS

| PICOS      | Subcategory   | k <sub>all</sub> | ES <sub>all</sub> | ES <sub>all</sub> Min | ES <sub>all</sub> Max | Rep Study       | k <sub>rep</sub> | n <sub>rep</sub> | ES <sub>rep</sub> | 95% CI <sub>rep</sub> | I <sup>2</sup> <sub>rep</sub> |
|------------|---------------|------------------|-------------------|-----------------------|-----------------------|-----------------|------------------|------------------|-------------------|-----------------------|-------------------------------|
| Population | Children      | NA               | NA                | NA                    | NA                    | NA              | NA               | NA               | NA                | NA                    | NA                            |
| Population | Adults        | 5                | 13                | -0.14                 | 0.38                  | Goldberg (2018) | 29               | 3810             | 0.29              | 0.13, 0.45            | 72                            |
| Population | Older adults  | NA               | NA                | NA                    | NA                    | NA              | NA               | NA               | NA                | NA                    | NA                            |
| Population | Employees     | NA               | NA                | NA                    | NA                    | NA              | NA               | NA               | NA                | NA                    | NA                            |
| Population | Healthcare    | NA               | NA                | NA                    | NA                    | NA              | NA               | NA               | NA                | NA                    | NA                            |
| Population | Students      | NA               | NA                | NA                    | NA                    | NA              | NA               | NA               | NA                | NA                    | NA                            |
| Problem    | Psychiatric   | 6                | 14                | -0.14                 | 0.38                  | Goldberg (2018) | 29               | 3810             | 0.29              | 0.13, 0.45            | 72                            |
| Problem    | Physical      | 1                | 2                 | 0.18                  | 0.18                  | Goldberg (2018) | 8                | 946              | 0.18              | -0.07, 0.44           | 51                            |
| Problem    | Cancer        | NA               | NA                | NA                    | NA                    | NA              | NA               | NA               | NA                | NA                    | NA                            |
| Problem    | Pain          | 1                | 1                 | 0.18                  | 0.18                  | Goldberg (2018) | 8                | 946              | 0.18              | -0.07, 0.44           | 51                            |
| Problem    | Weight/eating | 1                | 1                 | 0.18                  | 0.18                  | Goldberg (2018) | 5                | 437              | 0.18              | -0.16, 0.53           | 74                            |
| Problem    | Psychotic     | NA               | NA                | NA                    | NA                    | NA              | NA               | NA               | NA                | NA                    | NA                            |
| Problem    | Anxiety       | NA               | NA                | NA                    | NA                    | NA              | NA               | NA               | NA                | NA                    | NA                            |
| Problem    | Depression    | 4                | 6                 | 0.04                  | 0.35                  | Goldberg (2018) | 7                | 1064             | 0.04              | -0.13, 0.20           | 0                             |
| Problem    | MDD relapse   | 1                | 2                 | 0.16                  | 0.17                  | Kuyken (2016)   | 5                | 892              | 0.16              | 0.01, 0.31            | 0                             |
| Problem    | Substance use | 1                | 1                 | 0.38                  | 0.38                  | Goldberg (2018) | 4                | 900              | 0.38              | 0.00, 0.76            | 73                            |
| Problem    | Smoking       | NA               | NA                | NA                    | NA                    | NA              | NA               | NA               | NA                | NA                    | NA                            |
| Interv     | Various MBIs  | 3                | 10                | -0.14                 | 0.38                  | Goldberg (2018) | 29               | 3810             | 0.29              | 0.13, 0.45            | 72                            |
| Interv     | MBSR          | NA               | NA                | NA                    | NA                    | NA              | NA               | NA               | NA                | NA                    | NA                            |
| Interv     | MBCT          | 3                | 4                 | 0.16                  | 0.26                  | Lenz (2016)     | 7                | NA               | 0.16              | 0.01, 0.30            | 0                             |
| Interv     | MBSR/MBCT     | 3                | 4                 | 0.16                  | 0.26                  | Lenz (2016)     | 7                | NA               | 0.16              | 0.01, 0.30            | 0                             |
| Interv     | mHealth       | NA               | NA                | NA                    | NA                    | NA              | NA               | NA               | NA                | NA                    | NA                            |
| Outcome    | Psych sx      | 6                | 12                | -0.14                 | 0.38                  | Goldberg (2018) | 29               | 3810             | 0.29              | 0.13, 0.45            | 72                            |
| Outcome    | Stress        | NA               | NA                | NA                    | NA                    | NA              | NA               | NA               | NA                | NA                    | NA                            |
| Outcome    | Phys sx       | 2                | 2                 | -0.14                 | 0.18                  | Goldberg (2018) | 8                | 946              | 0.18              | -0.07, 0.44           | 51                            |
| Outcome    | Physiology    | NA               | NA                | NA                    | NA                    | NA              | NA               | NA               | NA                | NA                    | NA                            |
| Outcome    | Well-being    | NA               | NA                | NA                    | NA                    | NA              | NA               | NA               | NA                | NA                    | NA                            |

Running head: EMPIRICAL STATUS OF MINDFULNESS

|         |             |    |    |       |       |                  |    |      |       |             |       |
|---------|-------------|----|----|-------|-------|------------------|----|------|-------|-------------|-------|
| Outcome | Mindfulness | 1  | 1  | 0.1   | 0.1   | Goldberg (2019b) | 13 | 1430 | 0.1   | -0.08, 0.28 | 58.54 |
| Outcome | Objective   | NA | NA | NA    | NA    | NA               | NA | NA   | NA    | NA          | NA    |
| Outcome | Sleep       | 1  | 1  | -0.14 | -0.14 | Rusch (2019)     | 4  | 527  | -0.14 | -0.62, 0.34 | 84    |

Note: PICOS = populations, problems, interventions, comparisons, outcomes, and study design; Subcategory = PICOS subcategory;  $k_{all}$  = number of meta-analyses providing effect size for PICOS subcategory; Min = minimum effect size for subcategory;  $ES_{all}$  Max = maximum effect size for subcategory; Rep Study = meta-analysis that included the effect size based on the largest number of studies for PICOS subcategory;  $k_{rep}$  = number of studies in representative effect size;  $n_{rep}$  = number of participants for representative effect size;  $ES_{rep}$  = representative effect size; 95%  $CI_{rep}$  = confidence interval for representative effect size;  $I^2_{rep}$  = heterogeneity for representative effect size; NA = not available; sx = symptoms; MDD = major depressive disorder; MBI = mindfulness-based intervention; MBSR = mindfulness-based stress reduction; MBCT = mindfulness-based cognitive therapy; mHealth = mobile health; Phys = physical; Psych = psychiatric; Interv = intervention.

## Running head: EMPIRICAL STATUS OF MINDFULNESS

Supplemental Materials Table 7. Post-treatment comparisons with evidence-based treatments across PICOS

| PICOS      | Subcategory   | k <sub>all</sub> | ES <sub>all</sub> | ES <sub>all</sub> Min | ES <sub>all</sub> Max | Rep Study       | k <sub>rep</sub> | n <sub>rep</sub> | ES <sub>rep</sub> | 95% CI <sub>rep</sub> | I <sup>2</sup> <sub>rep</sub> |
|------------|---------------|------------------|-------------------|-----------------------|-----------------------|-----------------|------------------|------------------|-------------------|-----------------------|-------------------------------|
| Population | Children      | NA               | NA                | NA                    | NA                    | NA              | NA               | NA               | NA                | NA                    | NA                            |
| Population | Adults        | 2                | 7                 | -0.18                 | 0.42                  | Goldberg (2018) | 28               | 2806             | -0.004            | -0.15, 0.14           | 65                            |
| Population | Older adults  | NA               | NA                | NA                    | NA                    | NA              | NA               | NA               | NA                | NA                    | NA                            |
| Population | Employees     | NA               | NA                | NA                    | NA                    | NA              | NA               | NA               | NA                | NA                    | NA                            |
| Population | Healthcare    | NA               | NA                | NA                    | NA                    | NA              | NA               | NA               | NA                | NA                    | NA                            |
| Population | Students      | NA               | NA                | NA                    | NA                    | NA              | NA               | NA               | NA                | NA                    | NA                            |
| Problem    | Psychiatric   | 3                | 8                 | -0.18                 | 0.42                  | Goldberg (2018) | 28               | 2806             | -0.004            | -0.15, 0.14           | 65                            |
| Problem    | Physical      | 1                | 3                 | -0.02                 | 0.24                  | Khoo (2019)     | 17               | 1221             | 0.02              | -0.53, 0.59           | NA                            |
| Problem    | Cancer        | NA               | NA                | NA                    | NA                    | NA              | NA               | NA               | NA                | NA                    | NA                            |
| Problem    | Pain          | 1                | 3                 | -0.02                 | 0.24                  | Khoo (2019)     | 17               | 1221             | 0.02              | -0.53, 0.59           | NA                            |
| Problem    | Weight/eating | NA               | NA                | NA                    | NA                    | NA              | NA               | NA               | NA                | NA                    | NA                            |
| Problem    | Psychotic     | NA               | NA                | NA                    | NA                    | NA              | NA               | NA               | NA                | NA                    | NA                            |
| Problem    | Anxiety       | 2                | 2                 | -0.18                 | 0.17                  | Goldberg (2018) | 5                | 362              | -0.18             | -0.41, 0.06           | 38                            |
| Problem    | Depression    | 1                | 1                 | -0.01                 | -0.01                 | Goldberg (2018) | 10               | 1064             | -0.01             | -0.19, 0.16           | 0                             |
| Problem    | MDD relapse   | NA               | NA                | NA                    | NA                    | NA              | NA               | NA               | NA                | NA                    | NA                            |
| Problem    | Substance use | NA               | NA                | NA                    | NA                    | NA              | NA               | NA               | NA                | NA                    | NA                            |
| Problem    | Smoking       | 1                | 1                 | 0.42                  | 0.42                  | Goldberg (2018) | 4                | 587              | 0.42              | 0.20, 0.64            | 11                            |
| Interv     | Various MBIs  | 1                | 4                 | -0.18                 | 0.42                  | Goldberg (2018) | 28               | 2806             | -0.004            | -0.15, 0.14           | 65                            |
| Interv     | MBSR          | 1                | 3                 | -0.02                 | 0.24                  | Khoo (2019)     | 17               | 1221             | 0.02              | -0.53, 0.59           | NA                            |
| Interv     | MBCT          | NA               | NA                | NA                    | NA                    | NA              | NA               | NA               | NA                | NA                    | NA                            |
| Interv     | MBSR/MBCT     | 2                | 4                 | -0.02                 | 0.24                  | Khoo (2019)     | 17               | 1221             | 0.02              | -0.53, 0.59           | NA                            |
| Interv     | mHealth       | NA               | NA                | NA                    | NA                    | NA              | NA               | NA               | NA                | NA                    | NA                            |
| Outcome    | Psych sx      | 3                | 6                 | -0.18                 | 0.42                  | Goldberg (2018) | 28               | 2806             | -0.004            | -0.15, 0.14           | 65                            |
| Outcome    | Stress        | NA               | NA                | NA                    | NA                    | NA              | NA               | NA               | NA                | NA                    | NA                            |
| Outcome    | Phys sx       | 1                | 2                 | -0.02                 | 0.02                  | Khoo (2019)     | 17               | 1221             | 0.02              | -0.53, 0.59           | NA                            |
| Outcome    | Physiology    | NA               | NA                | NA                    | NA                    | NA              | NA               | NA               | NA                | NA                    | NA                            |
| Outcome    | Well-being    | NA               | NA                | NA                    | NA                    | NA              | NA               | NA               | NA                | NA                    | NA                            |

Running head: EMPIRICAL STATUS OF MINDFULNESS

|         |             |    |    |    |    |    |    |    |    |    |    |
|---------|-------------|----|----|----|----|----|----|----|----|----|----|
| Outcome | Mindfulness | NA |
| Outcome | Objective   | NA |
| Outcome | Sleep       | NA |

Note: PICOS = populations, problems, interventions, comparisons, outcomes, and study design; Subcategory = PICOS subcategory;  $k_{all}$  = number of meta-analyses providing effect size for PICOS subcategory; Min = minimum effect size for subcategory;  $ES_{all}$  Max = maximum effect size for subcategory; Rep Study = meta-analysis that included the effect size based on the largest number of studies for PICOS subcategory;  $k_{rep}$  = number of studies in representative effect size;  $n_{rep}$  = number of participants for representative effect size;  $ES_{rep}$  = representative effect size; 95%  $CI_{rep}$  = confidence interval for representative effect size;  $I^2_{rep}$  = heterogeneity for representative effect size; NA = not available; sx = symptoms; MDD = major depressive disorder; MBI = mindfulness-based intervention; MBSR = mindfulness-based stress reduction; MBCT = mindfulness-based cognitive therapy; mHealth = mobile health; Phys = physical; Psych = psychiatric; Interv = intervention.

## Running head: EMPIRICAL STATUS OF MINDFULNESS

Supplemental Materials Table 8. Follow-up comparisons with evidence-based treatments across PICOS

| PICOS      | Subcategory   | k <sub>all</sub> | ES <sub>all</sub> | ES <sub>all</sub> Min | ES <sub>all</sub> Max | Rep Study       | k <sub>rep</sub> | n <sub>rep</sub> | ES <sub>rep</sub> | 95% CI <sub>rep</sub> | I <sup>2</sup> <sub>rep</sub> |
|------------|---------------|------------------|-------------------|-----------------------|-----------------------|-----------------|------------------|------------------|-------------------|-----------------------|-------------------------------|
| Population | Children      | NA               | NA                | NA                    | NA                    | NA              | NA               | NA               | NA                | NA                    | NA                            |
| Population | Adults        | 2                | 3                 | 0.04                  | 0.17                  | Goldberg (2018) | 15               | 2806             | 0.09              | -0.14, 0.33           | 67                            |
| Population | Older adults  | NA               | NA                | NA                    | NA                    | NA              | NA               | NA               | NA                | NA                    | NA                            |
| Population | Employees     | NA               | NA                | NA                    | NA                    | NA              | NA               | NA               | NA                | NA                    | NA                            |
| Population | Healthcare    | NA               | NA                | NA                    | NA                    | NA              | NA               | NA               | NA                | NA                    | NA                            |
| Population | Students      | NA               | NA                | NA                    | NA                    | NA              | NA               | NA               | NA                | NA                    | NA                            |
| Problem    | Psychiatric   | 2                | 3                 | 0.04                  | 0.17                  | Goldberg (2018) | 15               | 2806             | 0.09              | -0.14, 0.33           | 67                            |
| Problem    | Physical      | NA               | NA                | NA                    | NA                    | NA              | NA               | NA               | NA                | NA                    | NA                            |
| Problem    | Cancer        | NA               | NA                | NA                    | NA                    | NA              | NA               | NA               | NA                | NA                    | NA                            |
| Problem    | Pain          | NA               | NA                | NA                    | NA                    | NA              | NA               | NA               | NA                | NA                    | NA                            |
| Problem    | Weight/eating | NA               | NA                | NA                    | NA                    | NA              | NA               | NA               | NA                | NA                    | NA                            |
| Problem    | Psychotic     | NA               | NA                | NA                    | NA                    | NA              | NA               | NA               | NA                | NA                    | NA                            |
| Problem    | Anxiety       | NA               | NA                | NA                    | NA                    | NA              | NA               | NA               | NA                | NA                    | NA                            |
| Problem    | Depression    | 2                | 2                 | 0.04                  | 0.17                  | Goldberg (2018) | 7                | 1064             | 0.04              | -0.13, 0.20           | 0                             |
| Problem    | MDD relapse   | 1                | 1                 | 0.17                  | 0.17                  | Kuyken (2016)   | 4                | 637              | 0.17              | 0.01, 0.35            | 0                             |
| Problem    | Substance use | NA               | NA                | NA                    | NA                    | NA              | NA               | NA               | NA                | NA                    | NA                            |
| Problem    | Smoking       | NA               | NA                | NA                    | NA                    | NA              | NA               | NA               | NA                | NA                    | NA                            |
| Interv     | Various MBIs  | 1                | 2                 | 0.04                  | 0.09                  | Goldberg (2018) | 15               | 2806             | 0.09              | -0.14, 0.33           | 67                            |
| Interv     | MBSR          | NA               | NA                | NA                    | NA                    | NA              | NA               | NA               | NA                | NA                    | NA                            |
| Interv     | MBCT          | 1                | 1                 | 0.17                  | 0.17                  | Kuyken (2016)   | 4                | 637              | 0.17              | 0.01, 0.35            | 0                             |
| Interv     | MBSR/MBCT     | 1                | 1                 | 0.17                  | 0.17                  | Kuyken (2016)   | 4                | 637              | 0.17              | 0.01, 0.35            | 0                             |
| Interv     | mHealth       | NA               | NA                | NA                    | NA                    | NA              | NA               | NA               | NA                | NA                    | NA                            |
| Outcome    | Psych sx      | 2                | 3                 | 0.04                  | 0.17                  | Goldberg (2018) | 15               | 2806             | 0.09              | -0.14, 0.33           | 67                            |
| Outcome    | Stress        | NA               | NA                | NA                    | NA                    | NA              | NA               | NA               | NA                | NA                    | NA                            |
| Outcome    | Phys sx       | NA               | NA                | NA                    | NA                    | NA              | NA               | NA               | NA                | NA                    | NA                            |
| Outcome    | Physiology    | NA               | NA                | NA                    | NA                    | NA              | NA               | NA               | NA                | NA                    | NA                            |
| Outcome    | Well-being    | NA               | NA                | NA                    | NA                    | NA              | NA               | NA               | NA                | NA                    | NA                            |

Running head: EMPIRICAL STATUS OF MINDFULNESS

|         |             |    |    |    |    |    |    |    |    |    |    |
|---------|-------------|----|----|----|----|----|----|----|----|----|----|
| Outcome | Mindfulness | NA |
| Outcome | Objective   | NA |
| Outcome | Sleep       | NA |

Note: PICOS = populations, problems, interventions, comparisons, outcomes, and study design; Subcategory = PICOS subcategory;  $k_{all}$  = number of meta-analyses providing effect size for PICOS subcategory; Min = minimum effect size for subcategory;  $ES_{all}$  Max = maximum effect size for subcategory; Rep Study = meta-analysis that included the effect size based on the largest number of studies for PICOS subcategory;  $k_{rep}$  = number of studies in representative effect size;  $n_{rep}$  = number of participants for representative effect size;  $ES_{rep}$  = representative effect size; 95%  $CI_{rep}$  = confidence interval for representative effect size;  $I^2_{rep}$  = heterogeneity for representative effect size; NA = not available; sx = symptoms; MDD = major depressive disorder; MBI = mindfulness-based intervention; MBSR = mindfulness-based stress reduction; MBCT = mindfulness-based cognitive therapy; mHealth = mobile health; Phys = physical; Psych = psychiatric; Interv = intervention.



## Running head: EMPIRICAL STATUS OF MINDFULNESS

Supplemental Materials Table 9. Results of moderator tests

| Moderator                   | # of tests | # significant | Description                                                                                                                                                                                                                                                                                                                                                                                                                                                                                                                                                                                                                                                                         |
|-----------------------------|------------|---------------|-------------------------------------------------------------------------------------------------------------------------------------------------------------------------------------------------------------------------------------------------------------------------------------------------------------------------------------------------------------------------------------------------------------------------------------------------------------------------------------------------------------------------------------------------------------------------------------------------------------------------------------------------------------------------------------|
| Study quality               | 29         | 4             | Smaller effects in studies using non-self-report measures (1 test; Goldberg et al., 2018), smaller effects in high quality studies (1 test; Bohlmeijer et al., 2010), larger effects in studies with high risk of bias (1 test; Dunning et al., 2019), larger effects in low quality studies (1 test; Goldberg et al., 2019a), no association with blind outcome assessment (1 test; de Abreu Costa et al., 2019), no association with non-self-report measures (9 tests; Goldberg et al., 2018), no association with use of intent-to-treat analyses (10 tests; Goldberg et al., 2018), no association with study quality (5 tests; Goldberg et al., 2019a; Halladay et al., 2019) |
| Dosage                      | 13         | 1             | Larger effects with longer interventions (Halladay et al., 2019), no association with intervention length (12 tests; Dunning et al., 2019; Halladay et al., 2019)                                                                                                                                                                                                                                                                                                                                                                                                                                                                                                                   |
| Participant characteristics | 13         | 4             | Larger effects with lower age (2 tests; Dunning et al., 2019; Lenz et al., 2016), smaller effects with higher percentage female (1 test; de Abreu Costa et al., 2019), larger effects in studies conducted in Asia or South African versus elsewhere (1 test; Lenz et al., 2016), no association with age (2 tests; de Abreu Costa et al., 2019; Lenz et al., 2016), no association with depression inclusion criteria (2 tests; Goldberg et al., 2019a), no association with gender (2 tests; Lenz et al., 2016), no association with country of origin (1 test; Lenz et al., 2016), no association with treatment setting (2 tests; Lenz et al., 2016)                            |
| Comparison type             | 12         | 1             | Larger effects with non-evidence-based treatment comparisons (1 test; Goldberg et al., 2020), no association with time matching (10 tests; Goldberg et al., 2018), no association with type of active comparison (1 test; Lenz et al., 2016)                                                                                                                                                                                                                                                                                                                                                                                                                                        |
| MBI type                    | 3          | 2             | Larger effects with MBCT versus MBSR (2 tests; Halladay et al., 2019), no difference between MBSR and MBCT (1 test; de Abreu Costa et al., 2019)                                                                                                                                                                                                                                                                                                                                                                                                                                                                                                                                    |
| Analysis type               | 1          | 0             | No association with analysis method (e Abreu Costa et al., 2019)                                                                                                                                                                                                                                                                                                                                                                                                                                                                                                                                                                                                                    |
| Researcher allegiance       | 1          | 1             | Researcher allegiance to MBIs associated with larger effects (1 test; Goldberg et al., 2020)                                                                                                                                                                                                                                                                                                                                                                                                                                                                                                                                                                                        |
| Therapist experience        | 1          | 0             | No association with therapist experience (de Abreu Costa et al., 2019)                                                                                                                                                                                                                                                                                                                                                                                                                                                                                                                                                                                                              |

Note: MBI = mindfulness-based intervention; MBSR = mindfulness-based stress reduction; MBCT = mindfulness-based cognitive therapy; # = number.

Running head: EMPIRICAL STATUS OF MINDFULNESS

Supplemental Materials Figure 10. Publication bias assessment methods.

| Method                                          | k  | Studies                                                                                                                                                                                                                                                                                                                                                                                                                                                                                           |
|-------------------------------------------------|----|---------------------------------------------------------------------------------------------------------------------------------------------------------------------------------------------------------------------------------------------------------------------------------------------------------------------------------------------------------------------------------------------------------------------------------------------------------------------------------------------------|
| Egger's test, funnel plot, and/or trim-and-fill | 13 | de Abreu Costa (2019), Wang (2018), Dunning (2019), Lenz (2016), Chiesa (2011), Galante (2013), Li (2017), Piet (2012), Visted (2015), Goldberg (2019a), Goldberg (2018), Goldberg (2019b), Teleki (2010)                                                                                                                                                                                                                                                                                         |
| Fail-safe N                                     | 6  | Wang (2018), Cillessen (2019), Piet (2012), Visted (2015), Goldberg (2019) CBT, Goldberg (2018)                                                                                                                                                                                                                                                                                                                                                                                                   |
| None                                            | 31 | Hedman-Lagerlöf (2018), Martin (2018), Norman (2019), Sanada (2016), Spinelli (2019), Zhang (2015), Zhang (2018), Anheyer (2019), Anheyer (2017), Haller (2017), Halladay (2019), Li (2019), Kuyken (2016), Schell (2019), Goyal (2014), Pascoe (2017), Bawa (2015), Zhang (2016), Piet (2011), Bohlmeijer (2010), Cuijpers (2019), Goldberg (2020), Phillips (2019), Spijkerman (2016), Stratton (2017), Strauss (2014), Demarzo (2015), Chen (2019), Linardon (2019), Rusch (2019), Khoo (2019) |

Note: Some meta-analyses included both trim-and-fill-based methods and fail-safe N. k = number of meta-analyses.

Running head: EMPIRICAL STATUS OF MINDFULNESS

Supplemental Materials Table 11. Risk of bias reporting

| Method                                                         | k  | Studies                                                                                                                                                                                                                                                                                         |
|----------------------------------------------------------------|----|-------------------------------------------------------------------------------------------------------------------------------------------------------------------------------------------------------------------------------------------------------------------------------------------------|
| Cochrane tool                                                  | 18 | de Abreu Costa (2019), Dunning (2019), Hedman-Lagerlöf (2018), Martin (2018), Norman (2019), Sanada (2016), Spinelli (2019), Zhang (2015), Anheyer (2019), Anheyer (2017), Haller (2017), Halladay (2019), Li (2019), Kuyken (2016), Cillessen (2019), Schell (2019), Wang (2018), Goyal (2014) |
| GRADE                                                          | 5  | Cillessen (2019), Schell (2019), Wang (2018), Pascoe (2017), Bawa (2015)                                                                                                                                                                                                                        |
| Jadad                                                          | 4  | Wang (2018), Zhang (2016), Piet (2011), Goldberg (2019a)                                                                                                                                                                                                                                        |
| Methods Guide for Conducting Comparative Effectiveness Reviews | 2  | Goyal (2014), Rusch (2019)                                                                                                                                                                                                                                                                      |
| Methodological Quality Rating Scale                            | 1  | Li (2017)                                                                                                                                                                                                                                                                                       |
| Quality Assessment Tool for Quantitative Studies               | 2  | Chen (2019), Linardon (2019)                                                                                                                                                                                                                                                                    |
| US Preventive Services Task Force Quality Rating Criteria      | 1  | Khoo (2018)                                                                                                                                                                                                                                                                                     |

Note: GRADE = Grading of Recommendations Assessment Development and Evaluation. k = number of meta-analyses.

Running head: EMPIRICAL STATUS OF MINDFULNESS

Supplemental Materials Table 12. Cochrane risk of bias coding.

| Study                  | <u>RS</u> |    |    | <u>AC</u> |     |    | <u>BP</u> |     |     | <u>BO</u> |    |     | <u>ID</u> |    |    | <u>SR</u> |     |    | <u>OB</u> |     |    |
|------------------------|-----------|----|----|-----------|-----|----|-----------|-----|-----|-----------|----|-----|-----------|----|----|-----------|-----|----|-----------|-----|----|
|                        | L         | U  | H  | L         | U   | H  | L         | U   | H   | L         | U  | H   | L         | U  | H  | L         | U   | H  | L         | U   | H  |
| Anheyer (2017)         | 100       | 0  | 0  | 75        | 25  | 0  | 0         | 50  | 50  | 25        | 25 | 50  | 75        | 0  | 25 | 75        | 0   | 25 | 75        | 0   | 25 |
| Anheyer (2019)         | 20        | 60 | 20 | 40        | 40  | 20 | 0         | 80  | 20  | 20        | 60 | 20  | 60        | 20 | 20 | 60        | 0   | 40 | 80        | 0   | 20 |
| Cillessen (2019)       | 62        | 34 | 3  | 41        | 55  | 3  | 7         | 69  | 24  | 31        | 62 | 7   | 76        | 21 | 3  | 59        | 0   | 41 | NA        | NA  | NA |
| de Abreu Costa (2019)  | 50        | 40 | 10 | 50        | 40  | 10 | 50        | 40  | 10  | 50        | 40 | 10  | 20        | 0  | 80 | 80        | 0   | 20 | 80        | 10  | 10 |
| Dunning (2019)         | 32        | 62 | 6  | 44        | 41  | 15 | 18        | 47  | 35  | 18        | 47 | 35  | 35        | 59 | 6  | 53        | 23  | 24 | NA        | NA  | NA |
| Goyal (2014)           | NA        | NA | NA | NA        | NA  | NA | NA        | NA  | NA  | NA        | NA | NA  | NA        | NA | NA | NA        | NA  | NA | NA        | NA  | NA |
| Halladay (2019)        | 100       | 0  | 0  | 46        | 0   | 54 | 10        | 0   | 90  | 10        | 0  | 90  | 50        | 0  | 50 | 98        | 0   | 2  | 95        | 0   | 5  |
| Haller (2017)          | 55        | 44 | 0  | 44        | 55  | 0  | 0         | 89  | 11  | 44        | 56 | 0   | 100       | 0  | 0  | 0         | 22  | 78 | 89        | 11  | 0  |
| Hedman-Lagerlöf (2018) | 58        | 42 | 0  | 27        | 68  | 5  | NA        | NA  | NA  | 47        | 12 | 41  | 63        | 6  | 31 | 84        | 5   | 11 | NA        | NA  | NA |
| Kuyken (2016)          | 100       | 0  | 0  | 100       | 0   | 0  | 0         | 0   | 100 | 0         | 0  | 100 | 100       | 0  | 0  | 100       | 0   | 0  | 100       | 0   | 0  |
| Li (2019)              | 50        | 50 | 0  | 25        | 75  | 0  | 0         | 100 | 0   | 50        | 50 | 0   | 50        | 25 | 25 | 0         | 100 | 0  | 0         | 100 | 0  |
| Martin (2018)          | 75        | 25 | 0  | 0         | 100 | 0  | 75        | 25  | 0   | 100       | 0  | 0   | 75        | 25 | 0  | 100       | 0   | 0  | NA        | NA  | NA |
| Norman (2019)          | 25        | 75 | 0  | 25        | 75  | 0  | 100       | 0   | 0   | 0         | 0  | 100 | 50        | 25 | 25 | 25        | 75  | 0  | 100       | 0   | 0  |
| Sanada (2016)          | 25        | 75 | 0  | 25        | 75  | 0  | 50        | 50  | 0   | NA        | NA | NA  | 50        | 50 | 0  | NA        | NA  | NA | NA        | NA  | NA |
| Schell (2019)          | 50        | 50 | 0  | 40        | 60  | 0  | 0         | 0   | 100 | 0         | 0  | 100 | 60        | 20 | 20 | 10        | 60  | 30 | 80        | 0   | 20 |
| Spinelli (2019)        | 60        | 35 | 5  | 0         | 95  | 5  | 0         | 0   | 100 | 0         | 95 | 5   | 42        | 27 | 31 | 13        | 87  | 0  | 63        | 11  | 26 |
| Wang (2018)            | 91        | 9  | 0  | 36        | 0   | 63 | 9         | 0   | 91  | 45        | 0  | 55  | 82        | 0  | 18 | 100       | 0   | 0  | 0         | 100 | 0  |
| Zhang (2015)           | 100       | 0  | 0  | 100       | 0   | 0  | 33        | 0   | 67  | 33        | 50 | 17  | 100       | 0  | 0  | 100       | 0   | 0  | 100       | 0   | 0  |

Note: L = low risk for bias; U = unclear risk for bias; H = high risk for bias; NA = not available; RS = randomization sequence generation; AC = allocation concealment; BP = blinding of personnel and participants; BO = blinding of outcome assessor; ID = incomplete data; SR = selective reporting; OB = other bias. Dimensions based on Cochrane guidelines (Higgins & Green, 2008).

Running head: EMPIRICAL STATUS OF MINDFULNESS

Supplemental Materials Table 13. Adverse events reporting

| Finding                                                  | k  | Studies                                                                                                                                                              |
|----------------------------------------------------------|----|----------------------------------------------------------------------------------------------------------------------------------------------------------------------|
| Lack of reporting in primary studies                     | 11 | Bawa (2015), Cillesen (2019), Demarzo (2015), Galante (2013), Schell (2019), Wang (2018), Anheyer (2019), Rusch (2019), Anheyer (2017), Haller (2017), Kuyken (2016) |
| No evidence of increased risk                            | 1  | Rusch (2019), Kuyken (2016)                                                                                                                                          |
| No SAE events                                            | 4  | Anheyer (2019), Chiesa (2011), Anheyer (2017), Haller (2017)                                                                                                         |
| Mild AEs reported in MBI                                 | 1  | Anheyer (2017)                                                                                                                                                       |
| AEs coded but not reported in meta-analysis              | 1  | de Abreu Costa (2019)                                                                                                                                                |
| Lack of adverse reporting noted, unclear if coded        | 1  | Li (2019)                                                                                                                                                            |
| Lack of reporting in current meta-analysis as limitation | 1  | Halladay (2019)                                                                                                                                                      |

Note: AE = adverse event; SAE = serious adverse event; MBI = mindfulness-based intervention. k = number of meta-analyses.

**References for included meta-analyses**

- Anheyer, D., Haller, H., Barth, J., Lauche, R., Dobos, G., & Cramer, H. (2017). Mindfulness-based stress reduction for treating low back pain: a systematic review and meta-analysis. *Annals of Internal Medicine*, *166*(11), 799-807.
- Anheyer, D., Leach, M. J., Klose, P., Dobos, G., & Cramer, H. (2019). Mindfulness-based stress reduction for treating chronic headache: A systematic review and meta-analysis. *Cephalalgia*, *39*(4), 544-555.
- Bawa, F. L. M., Mercer, S. W., Atherton, R. J., Clague, F., Keen, A., Scott, N. W., & Bond, C. M. (2015). Does mindfulness improve outcomes in patients with chronic pain? Systematic review and meta-analysis. *British Journal of General Practice*, *65*(635), e387-e400.
- Bohlmeijer, E., Prenger, R., Taal, E., & Cuijpers, P. (2010). The effects of mindfulness-based stress reduction therapy on mental health of adults with a chronic medical disease: A meta-analysis. *Journal of Psychosomatic Research*, *68*(6), 539-544.  
doi:10.1016/j.jpsychores.2009.10.005
- Chen, D., Sun, W., Liu, N., Wang, J., Guo, P., Zhang, X., & Zhang, W. (2019). Effects of nonpharmacological interventions on depressive symptoms and depression among nursing students: A systematic review and meta-analysis. *Complementary Therapies in Clinical Practice*, *34*, 217-228.
- Chiesa, A., & Serretti, A. (2011). Mindfulness based cognitive therapy for psychiatric disorders: A systematic review and meta-analysis. *Psychiatry Research*, *187*, 441-453.  
doi:10.1016/j.psychres.2010.08.011
- Cillessen, L., Johannsen, M., Speckens, A. E., & Zachariae, R. (2019). Mindfulness-based

Running head: EMPIRICAL STATUS OF MINDFULNESS

interventions for psychological and physical health outcomes in cancer patients and survivors: A systematic review and meta-analysis of randomized controlled trials.

*Psycho-Oncology*, 28(12), 2257-2269.

Cuijpers, P., Karyotaki, E., de Wit, L., & Ebert, D. D. (2020). The effects of fifteen evidence-supported therapies for adult depression: A meta-analytic review. *Psychotherapy Research*, 30(3), 279-293.

de Abreu Costa, M., de Oliveira, G. S. D. A., Tatton-Ramos, T., Manfro, G. G., & Salum, G. A. (2019). Anxiety and stress-related disorders and mindfulness-based interventions: a systematic review and multilevel meta-analysis and meta-regression of multiple outcomes. *Mindfulness*, 10(6), 996-1005.

Demarzo, M. M., Montero-Marin, J., Cuijpers, P., Zabaleta-del-Olmo, E., Mahtani, K. R., Vellinga, A., ... & García-Campayo, J. (2015). The efficacy of mindfulness-based interventions in primary care: A meta-analytic review. *The Annals of Family Medicine*, 13(6), 573-582.

Dunning, D. L., Griffiths, K., Kuyken, W., Crane, C., Foulkes, L., Parker, J., & Dalgleish, T. (2019). The effects of mindfulness-based interventions on cognition and mental health in children and adolescents—a meta-analysis of randomized controlled trials. *Journal of Child Psychology and Psychiatry*, 60(3), 244-258. doi:10.1111/jcpp.12980

Galante, J., Iribarren, S. J., & Pearce, P. F. (2013). Effects of mindfulness-based cognitive therapy on mental disorders: a systematic review and meta-analysis of randomised controlled trials. *Journal of Research in Nursing*, 18(2), 133-155.

Goldberg, S. B., & Tucker, R. P. (2020). Allegiance effects in mindfulness-based

Running head: EMPIRICAL STATUS OF MINDFULNESS

interventions for psychiatric disorders: A meta-re-analysis. *Psychotherapy Research*.

doi: 10.1080/10503307.2019.1664783

Goldberg, S. B., Tucker, R. P., Greene, P. A., Davidson, R. J., Kearney, D. J., & Simpson, T.L. (2019a). Mindfulness-based cognitive therapy for the treatment of current depressive symptoms: A meta-analysis. *Cognitive Behaviour Therapy*, 48(6), 445-462.

doi: 10.1080/16506073.2018.1556330

Goldberg, S.B., Tucker, R.P., Greene, P.A., Davidson, R.J., Wampold, B.E., Kearney, D.J., & Simpson, T.L. (2018). Mindfulness-based interventions for psychiatric disorders: A systematic review and meta-analysis. *Clinical Psychology Review*, 59, 52-60.

doi:10.1016/j.cpr.2017.10.011

Goldberg, S. B., Tucker, R. P., Greene, P. A., Simpson, T.L., Hoyt, W. T., Kearney, D. J., & Davidson, R. J. (2019b). What can we learn from randomized clinical trials about the construct validity of self- report measures of mindfulness? A meta-analysis.

*Mindfulness*, 10(5), 775-785. doi: 10.1007/s12671-018-1032-y

Goyal, M., Singh, S., Sibinga, E.M., Gould, N.F., Rowland-Seymour, A., Sharma, R.,...& Haythornthwaite, J.A. (2014). Meditation programs for psychological stress and well-being: A systematic review and meta-analysis. *JAMA Internal Medicine*, 174(3), 357-368.

doi:10.1001/jamainternmed.2013.13018

Halladay, J. E., Dawdy, J. L., McNamara, I. F., Chen, A. J., Vitoroulis, I., McInnes, N., & Munn, C. (2019). Mindfulness for the mental health and well-being of post-secondary students: A systematic review and meta-analysis. *Mindfulness*, 10(3), 397-414.

Haller, H., Winkler, M. M., Klose, P., Dobos, G., Kuemmel, S., & Cramer, H. (2017).



Running head: EMPIRICAL STATUS OF MINDFULNESS

Mindfulness-based interventions for women with breast cancer: An updated systematic review and meta-analysis. *Acta Oncologica*, 56(12), 1665-1676.

Hedman-Lagerlöf, M., Hedman-Lagerlöf, E., & Öst, L. G. (2018). The empirical support for mindfulness-based interventions for common psychiatric disorders: A systematic review and meta-analysis. *Psychological Medicine*, 48, 2116-2129.

doi: 10.1017/ S0033291718000259

Khoo, E. L., Small, R., Cheng, W., Hatchard, T., Glynn, B., Rice, D. B., ... & Poulin, P. A. (2019). Comparative evaluation of group-based mindfulness-based stress reduction and cognitive behavioural therapy for the treatment and management of chronic pain: A systematic review and network meta-analysis. *Evidence-Based Mental Health*, 22(1), 26-35.

Kuyken, W., Warren, F.C., Taylor, R.S., Whalley, B., Crane, C., Bondolfi, G.,...& Dalgeish, T. (2016). Efficacy of mindfulness-based cognitive therapy in prevention of depressive relapse: An individual patient data meta-analysis from randomized trials. *JAMA Psychiatry*, 73(6), 565-574. doi:10.1001/jamapsychiatry.2016.0076

Lenz, A. S., Hall, J., & Bailey Smith, L. (2016). Meta-analysis of group mindfulness-based cognitive therapy for decreasing symptoms of acute depression. *The Journal for Specialists in Group Work*, 41(1), 44-70.

Li, S. Y. H., & Bressington, D. (2019). The effects of mindfulness-based stress reduction on depression, anxiety, and stress in older adults: A systematic review and meta-analysis. *International Journal of Mental Health Nursing*, 28(3), 635-656.

Li, W., Howard, M. O., Garland, E. L., McGovern, P., & Lazar, M. (2017). Mindfulness treatment

Running head: EMPIRICAL STATUS OF MINDFULNESS

- for substance misuse: A systematic review and meta-analysis. *Journal of Substance Abuse Treatment*, 75, 62-96. doi: 10.1016/j.jsat.2017.01.008
- Linardon, J., Gleeson, J., Yap, K., Murphy, K., & Brennan, L. (2019). Meta-analysis of the effects of third-wave behavioural interventions on disordered eating and body image concerns: Implications for eating disorder prevention. *Cognitive Behaviour Therapy*, 48(1), 15-38.
- Martin, K. J., Golijani-Moghaddam, N., & dasNair, R. (2018). Mindfulness self-help interventions for symptoms of depression, anxiety and stress: Review and meta-analysis. *International Journal of Therapy and Rehabilitation*, 25(2), 82-95.
- Norman, H., Marzano, L., Coulson, M., & Oskis, A. (2019). Effects of mindfulness-based interventions on alexithymia: a systematic review. *Evidence-Based Mental Health*, 22(1), 36-43.
- Pascoe, M. C., Thompson, D. R., Jenkins, Z. M., & Ski, C. F. (2017). Mindfulness mediates the physiological markers of stress: systematic review and meta-analysis. *Journal of Psychiatric Research*, 95, 156-178.
- Phillips, E. A., Gordeev, V. S., & Schreyögg, J. (2019). Effectiveness of occupational e-mental health interventions: a systematic review and meta-analysis of randomized controlled trials. *Scandinavian Journal of Work, Environment & Health*, 45(6), 560-576.
- Piet, J., & Hougaard, E. (2011). The effect of mindfulness-based cognitive therapy for prevention of relapse in recurrent major depressive disorder: A systematic review and meta-analysis. *Clinical Psychology Review*, 31(6), 1032-1040.
- Piet, J., Würtzen, H., & Zachariae, R. (2012). The effect of mindfulness-based therapy on symptoms of anxiety and depression in adult cancer patients and survivors: A systematic

Running head: EMPIRICAL STATUS OF MINDFULNESS

review and meta-analysis. *Journal of Consulting and Clinical Psychology*, 80(6), 1007-1020.

Rusch, H. L., Rosario, M., Levison, L. M., Olivera, A., Livingston, W. S., Wu, T., & Gill, J. M.

(2019). The effect of mindfulness meditation on sleep quality: a systematic review and meta-analysis of randomized controlled trials. *Annals of the New York Academy of Sciences*, 1445(1), 5-16.

Sanada, K., Montero-Marin, J., Alda Díez, M., Salas-Valero, M., Pérez-Yus, M. C., Morillo, H., ...

& García-Campayo, J. (2016). Effects of mindfulness-based interventions on salivary cortisol in healthy adults: a meta-analytical review. *Frontiers in Physiology*, 7, 471.

Schell, L. K., Monsef, I., Woekel, A., & Skoetz, N. (2019). Mindfulness-based stress reduction

for women diagnosed with breast cancer. *Cochrane Database of Systematic Reviews*, (3).

Spijkerman, M. P. J., Pots, W. T. M., & Bohlmeijer, E. T. (2016). Effectiveness of online

mindfulness-based interventions in improving mental health: A review and meta-analysis of randomised controlled trials. *Clinical Psychology Review*, 45, 102-114.

doi: 10.1016/j.cpr.2016.03.009

Spinelli, C., Wisener, M., & Khoury, B. (2019). Mindfulness training for healthcare professionals

and trainees: A meta-analysis of randomized controlled trials. *Journal of Psychosomatic Research*, 120,29-38.

Stratton, E., Lampit, A., Choi, I., Calvo, R. A., Harvey, S. B., & Glozier, N. (2017). Effectiveness of

eHealth interventions for reducing mental health conditions in employees: A systematic review and meta-analysis. *PLOS ONE*, 12(12).

Running head: EMPIRICAL STATUS OF MINDFULNESS

Strauss, C., Cavanagh, K., Oliver, An., & Pettman, D. (2014). Mindfulness-based interventions for people diagnosed with a current episode of an anxiety or depressive disorder: A meta-analysis of randomised controlled trials. *PLOS ONE*, *9*(4), e96110.

doi:10.1371/journal.pone.0096110

Teleki, J. W. (2010). *Mindfulness-based stress reduction: A meta-analysis of psychological outcomes (Unpublished doctoral dissertation)*. PGSP-Stanford PsyD Consortium, Palo Alto, CA.

Visted, E., Vøllestad, J., Nielsen, M. B., & Nielsen, G. H. (2015). The impact of group-based mindfulness training on self-reported mindfulness: A systematic review and meta-analysis. *Mindfulness*, *6*(3), 501-522.

Wang, Y. Y., Li, X. H., Zheng, W., Xu, Z. Y., Ng, C. H., Ungvari, G. S., ... & Xiang, Y. T. (2018). Mindfulness-based interventions for major depressive disorder: a comprehensive meta-analysis of randomized controlled trials. *Journal of Affective Disorders*, *229*, 429-436.

doi: 10.1016/j.jad.2017.12.093

Zhang, M. F., Wen, Y. S., Liu, W. Y., Peng, L. F., Wu, X. D., & Liu, Q. W. (2015). Effectiveness of mindfulness-based therapy for reducing anxiety and depression in patients with cancer: A meta-analysis. *Medicine*, *94*(45).

Zhang, J., Xu, R., Wang, B., & Wang, J. (2016). Effects of mindfulness-based therapy for patients with breast cancer: a systematic review and meta-analysis. *Complementary Therapies in Medicine*, *26*, 1-10.

Running head: EMPIRICAL STATUS OF MINDFULNESS

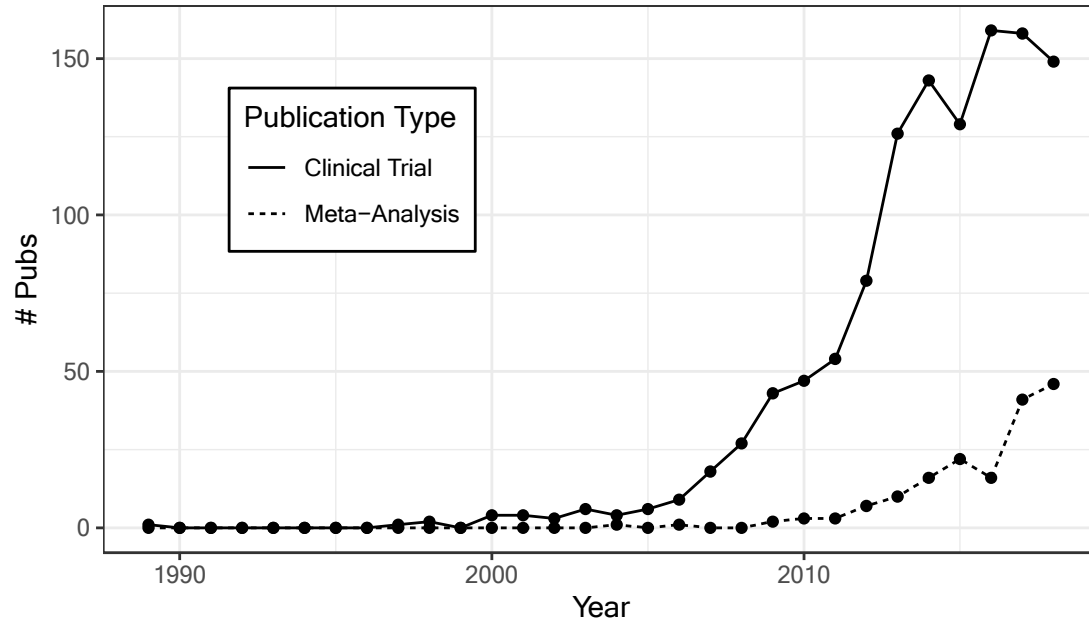

Supplemental Materials Figure 1. Clinical trials and meta-analyses appearing in PubMed including the term “mindfulness.”

## Running head: EMPIRICAL STATUS OF MINDFULNESS

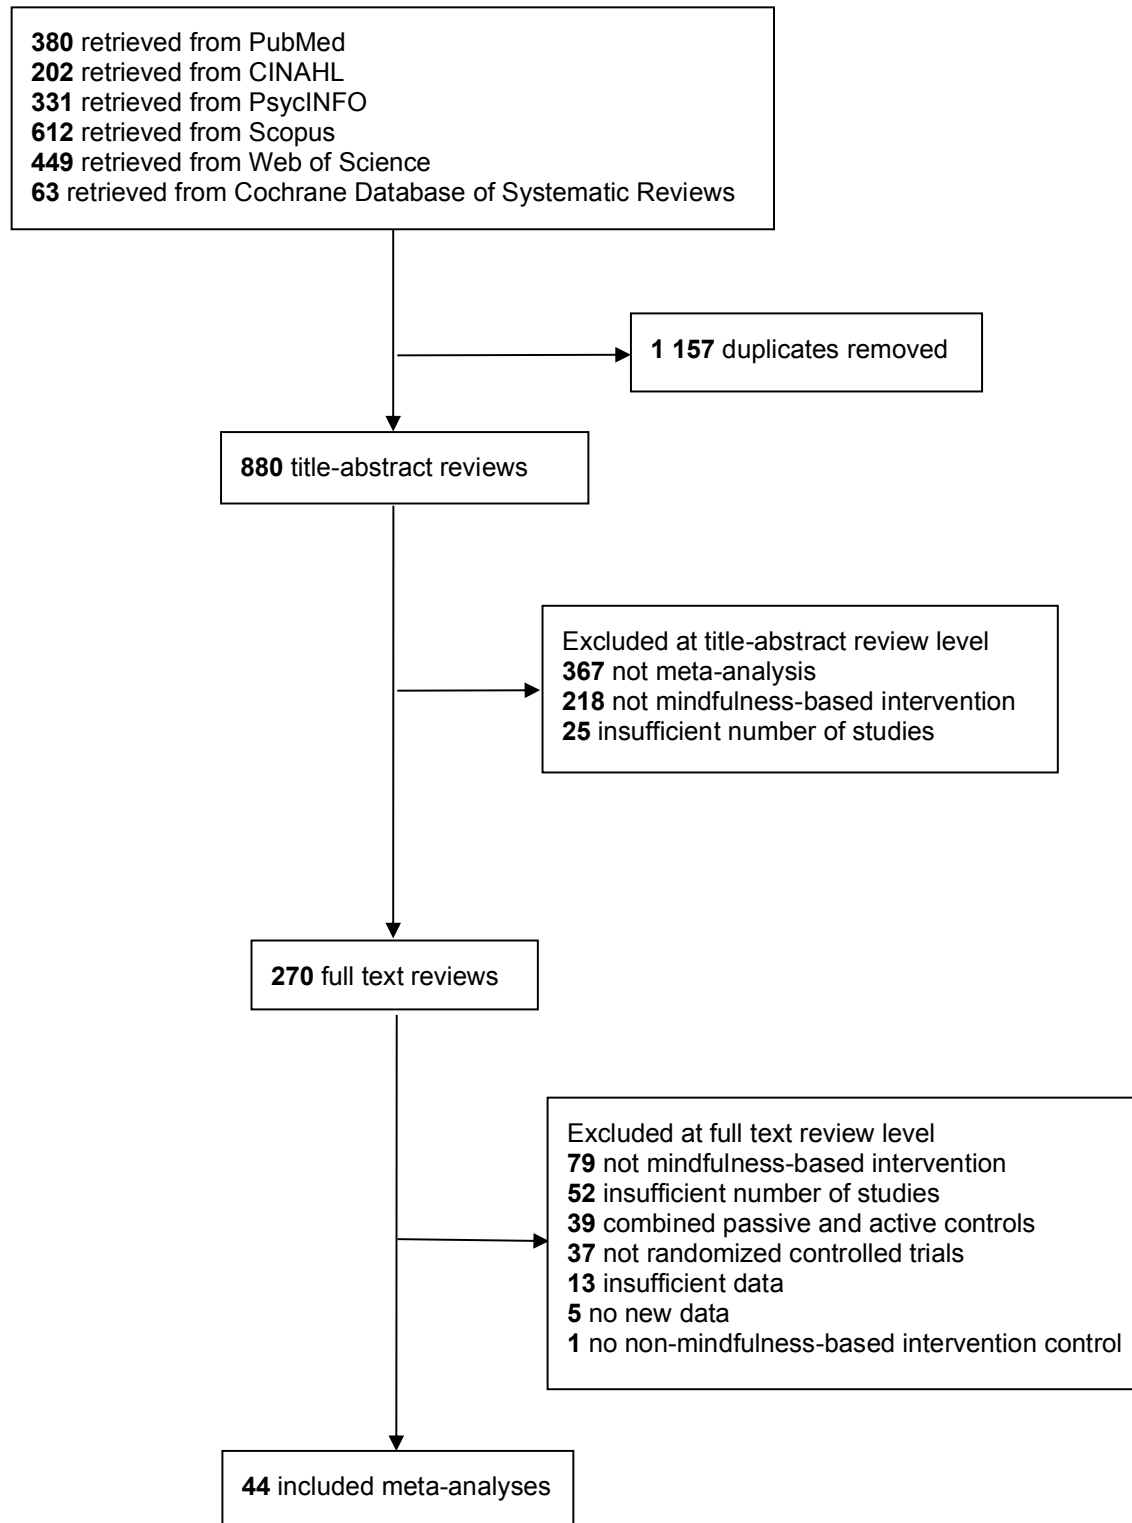

Supplemental Materials Figure 2. PRISMA flow diagram

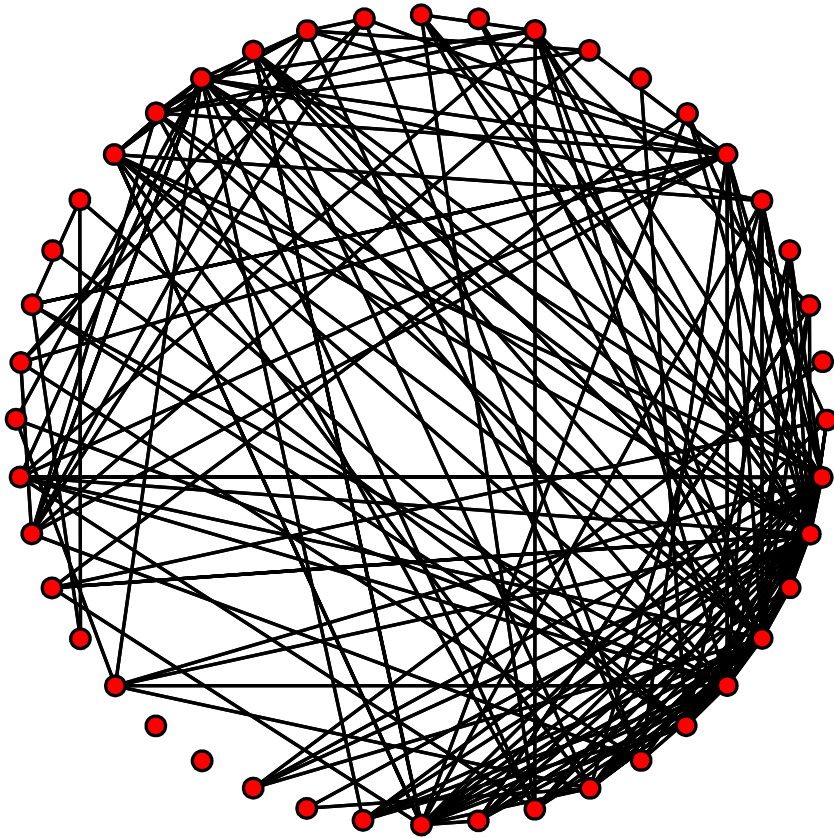

Supplemental Materials Figure 3. Network figure of the 44 meta-analyses and their overlapping studies. Each node represents a meta-analysis and each line represents one or more studies that are shared between meta-analyses.

Running head: EMPIRICAL STATUS OF MINDFULNESS

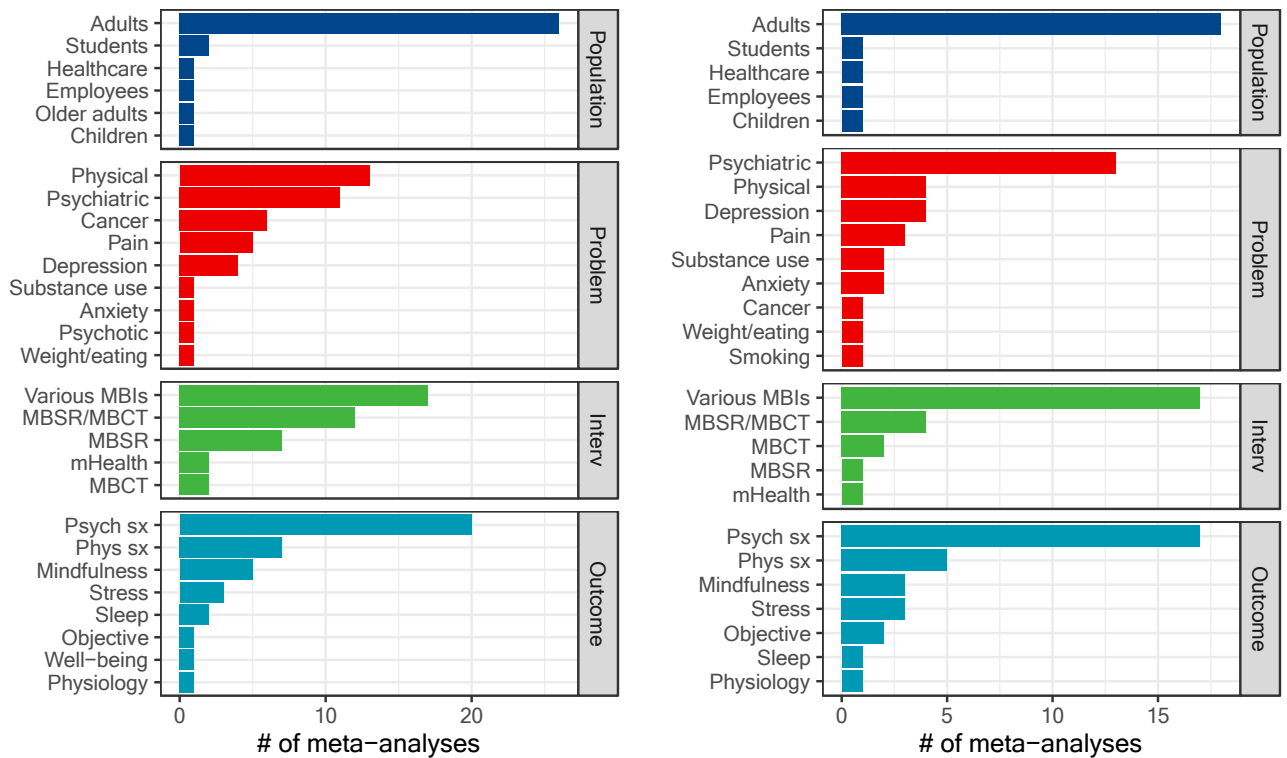

Supplemental Materials Figure 4. Number of meta-analyses reporting effect sizes across PICOS subcategories. Left panel reflects comparisons with passive controls and right panel reflects comparisons with active controls. MBSR = mindfulness-based stress reduction; MBCT = mindfulness-based cognitive therapy; mHealth = mobile health; Psych sx = psychiatric symptoms; Phys = physical symptoms; Interv = intervention.



## Running head: EMPIRICAL STATUS OF MINDFULNESS

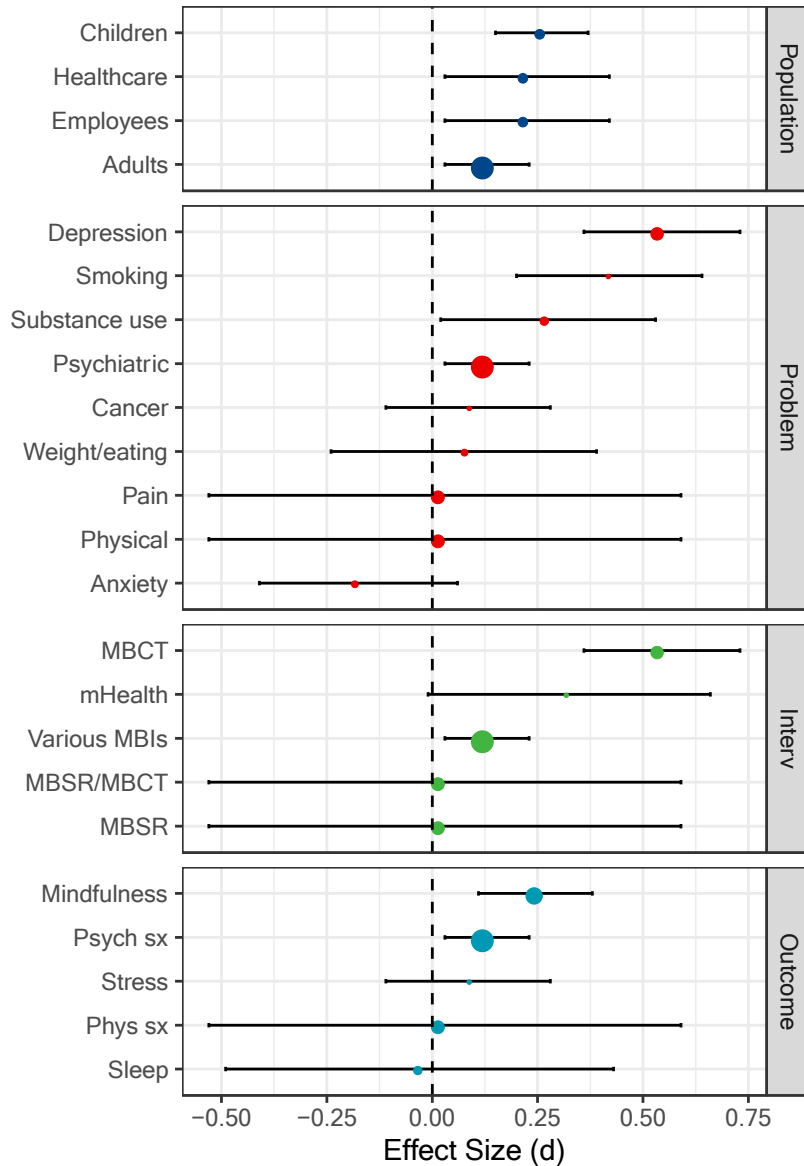

Supplemental Materials Figure 5. Comparisons with specific active controls at post-treatment based on the largest number of studies. The size of each point is relative to the number of primary studies it represents. MBSR = mindfulness-based stress reduction; MBCT = mindfulness-based cognitive therapy; mHealth = mobile health; Psych sx = psychiatric symptoms; Phys = physical symptoms; Interv = intervention.

## Running head: EMPIRICAL STATUS OF MINDFULNESS

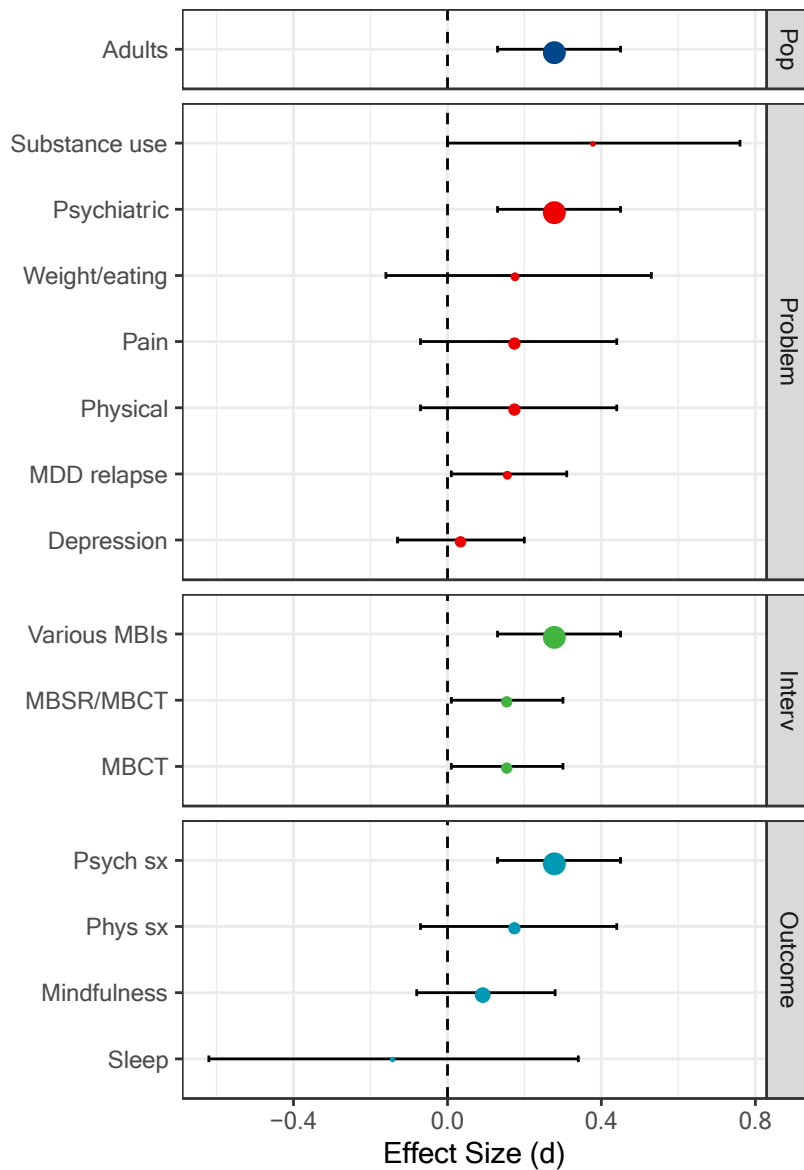

Supplemental Materials Figure 6. Comparisons with specific active controls at follow-up based on the largest number of studies. The size of each point is relative to the number of primary studies it represents. MBSR = mindfulness-based stress reduction; MBCT = mindfulness-based cognitive therapy; mHealth = mobile health; Psych sx = psychiatric symptoms; Phys = physical symptoms; MDD = major depressive disorder; Pop = population; Interv = intervention.

## Running head: EMPIRICAL STATUS OF MINDFULNESS

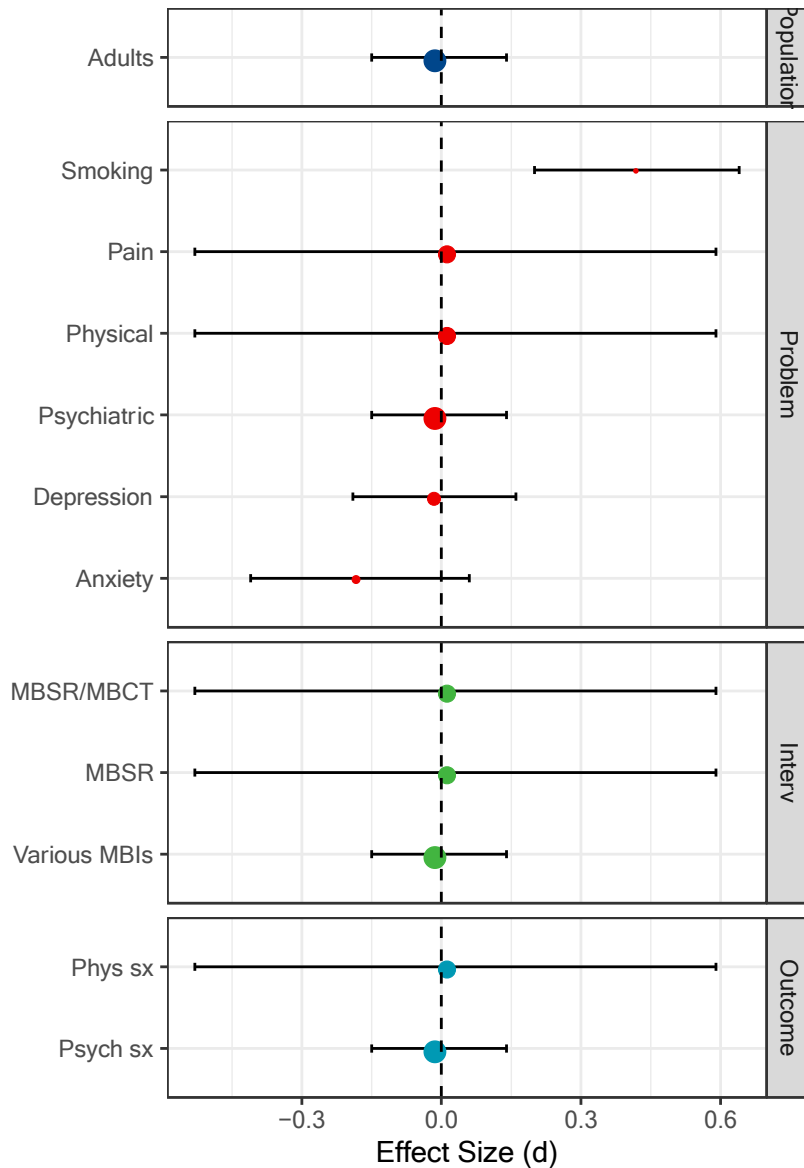

Supplemental Materials Figure 7. Comparisons with evidence-based treatments at post-treatment based on the largest number of studies. The size of each point is relative to the number of primary studies it represents. MBSR = mindfulness-based stress reduction; MBCT = mindfulness-based cognitive therapy; mHealth = mobile health; Psych sx = psychiatric symptoms; Phys = physical symptoms; Pop = population; Interv = intervention.

## Running head: EMPIRICAL STATUS OF MINDFULNESS

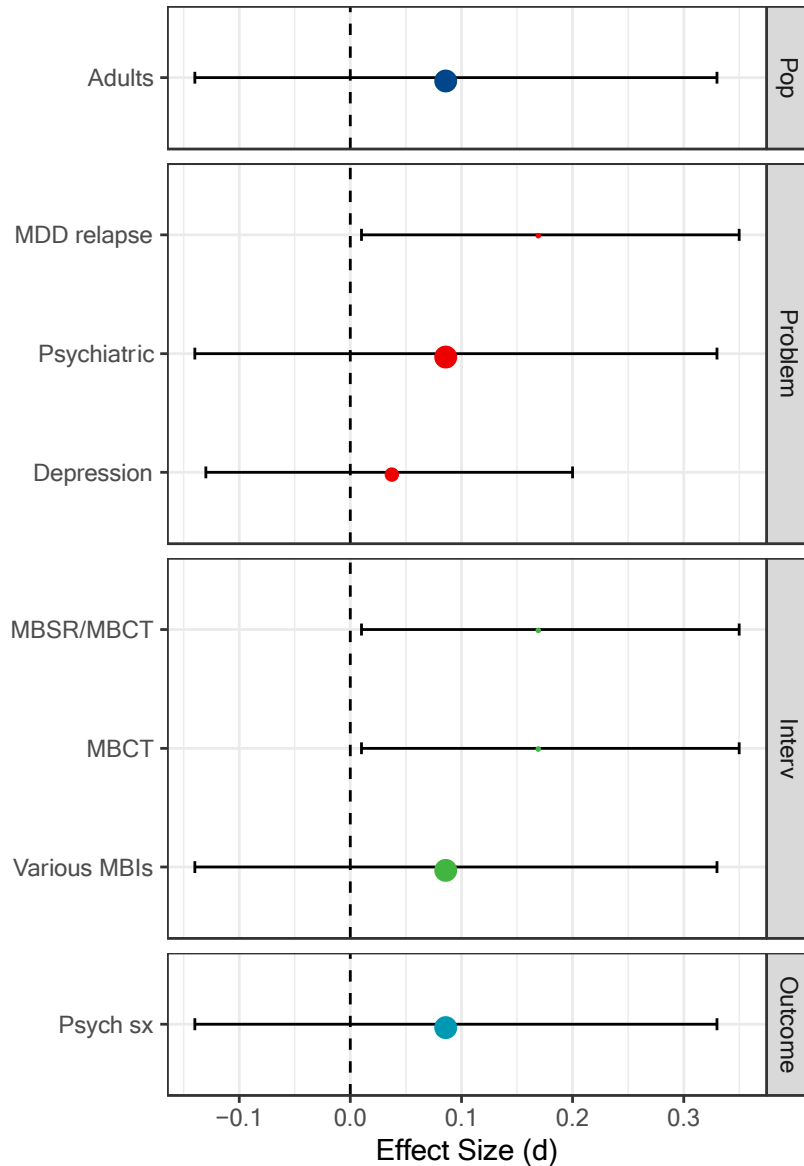

Supplemental Materials Figure 8. Comparisons with evidence-based treatments at follow-up based on the largest number of studies. The size of each point is relative to the number of primary studies it represents. MBSR = mindfulness-based stress reduction; MBCT = mindfulness-based cognitive therapy; Psych sx = psychiatric symptoms; MDD = major depressive disorder; Pop = population; Interv = intervention.

## Running head: EMPIRICAL STATUS OF MINDFULNESS

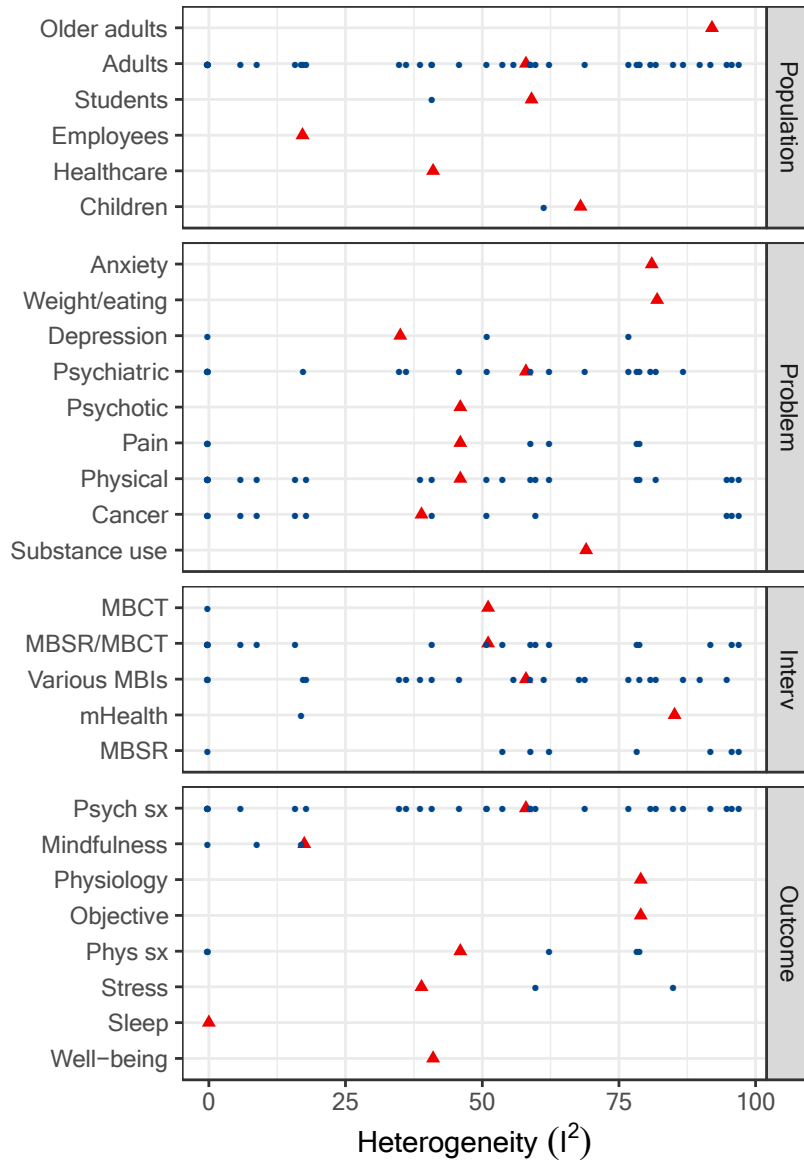

Supplemental Materials Figure 9. Estimates of heterogeneity for comparisons with passive controls. The representative estimate for each PICOS (i.e., based on the largest number of studies) is displayed as a red triangle. MBSR = mindfulness-based stress reduction; MBCT = mindfulness-based cognitive therapy; mHealth = mobile health; Psych sx = psychiatric symptoms; Phys = physical symptoms; Interv = intervention.

Running head: EMPIRICAL STATUS OF MINDFULNESS

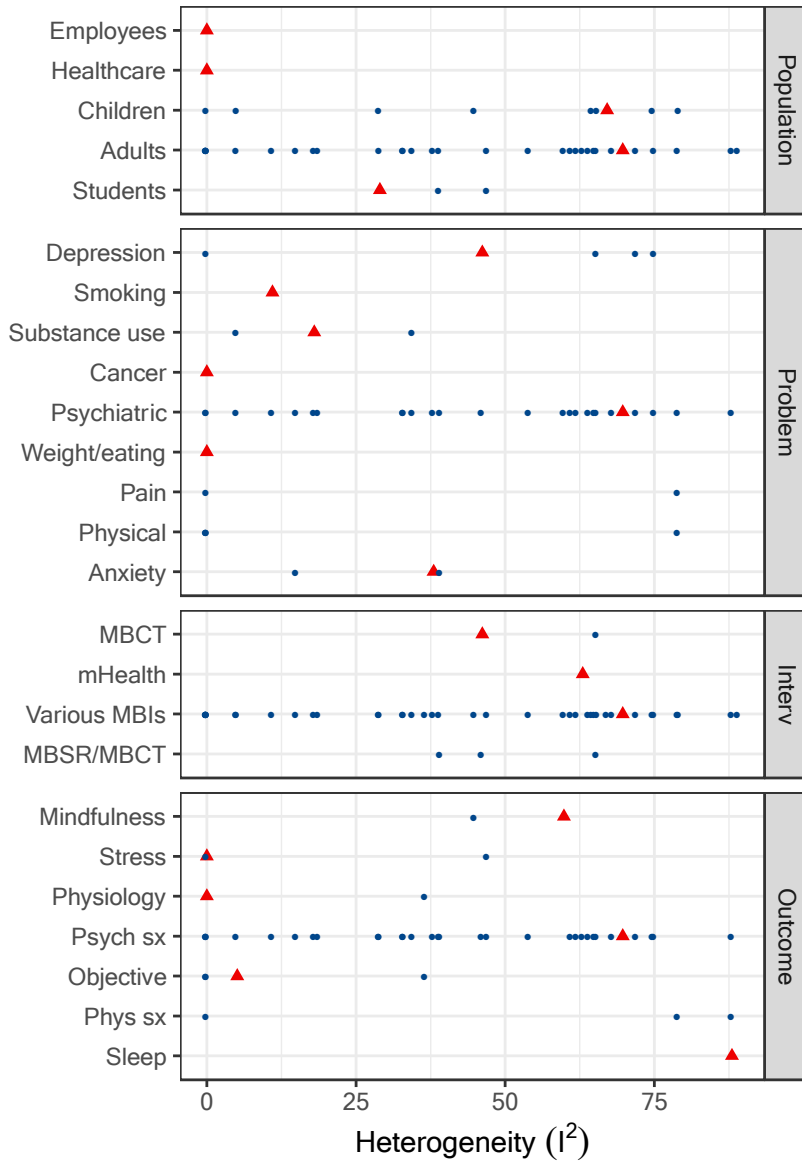

Supplemental Materials Figure 10. Estimates of heterogeneity for comparisons with active controls. The representative estimate for each PICOS (i.e., based on the largest number of studies) is displayed as a red triangle. MBSR = mindfulness-based stress reduction; MBCT = mindfulness-based cognitive therapy; mHealth = mobile health; Psych sx = psychiatric symptoms; Phys = physical symptoms; Interv = intervention.

## Running head: EMPIRICAL STATUS OF MINDFULNESS

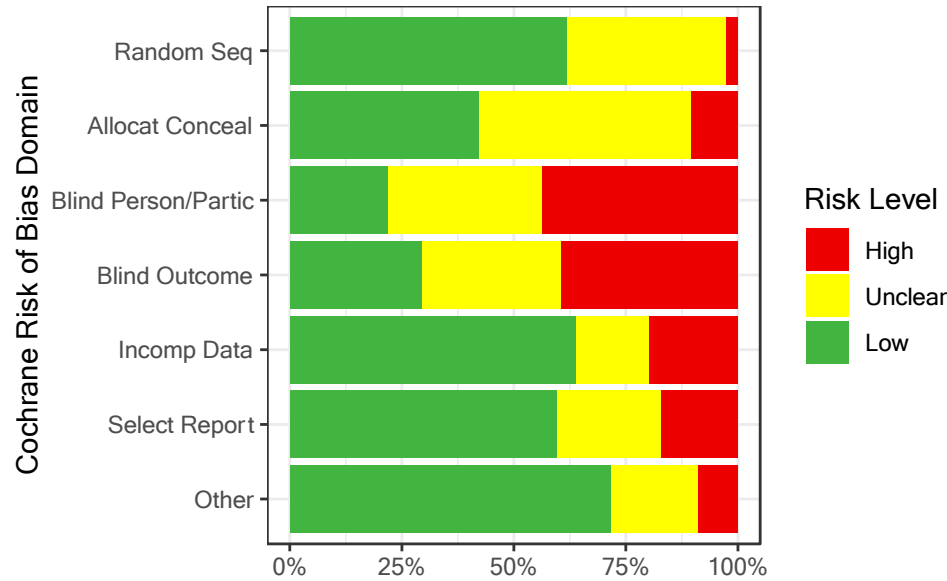

Supplemental Materials Figure 11. Summary of Cochrane risk of bias assessment across 18 meta-analyses. Random seq = random sequence generation; Allocat Conceal = allocation concealment; Blind Person/Partic = blinding of personnel and participants; Blind Outcome = blinding of outcome assessment; Incomp Data = incomplete outcome data; Select Report = selective reporting; Other = other bias.

Running head: EMPIRICAL STATUS OF MINDFULNESS

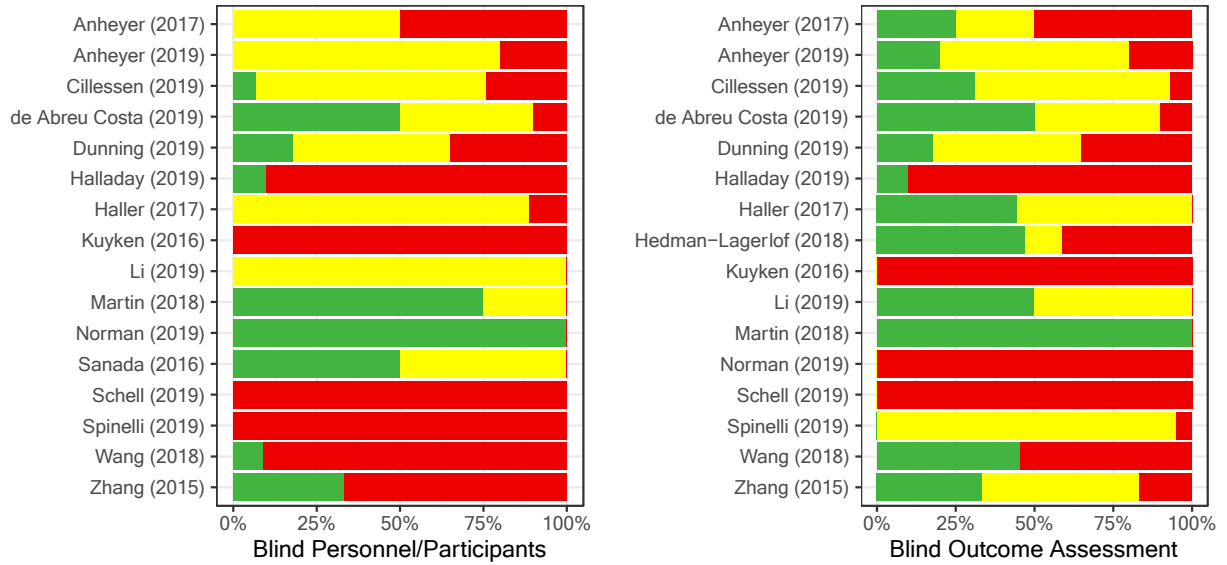

Supplemental Materials Figure 12. Variability in Cochrane risk of bias assessment related to blinding of participants and personnel and blinding of outcome assessment. Green = low risk, yellow = unclear risk, red = high risk.



## Running head: EMPIRICAL STATUS OF MINDFULNESS

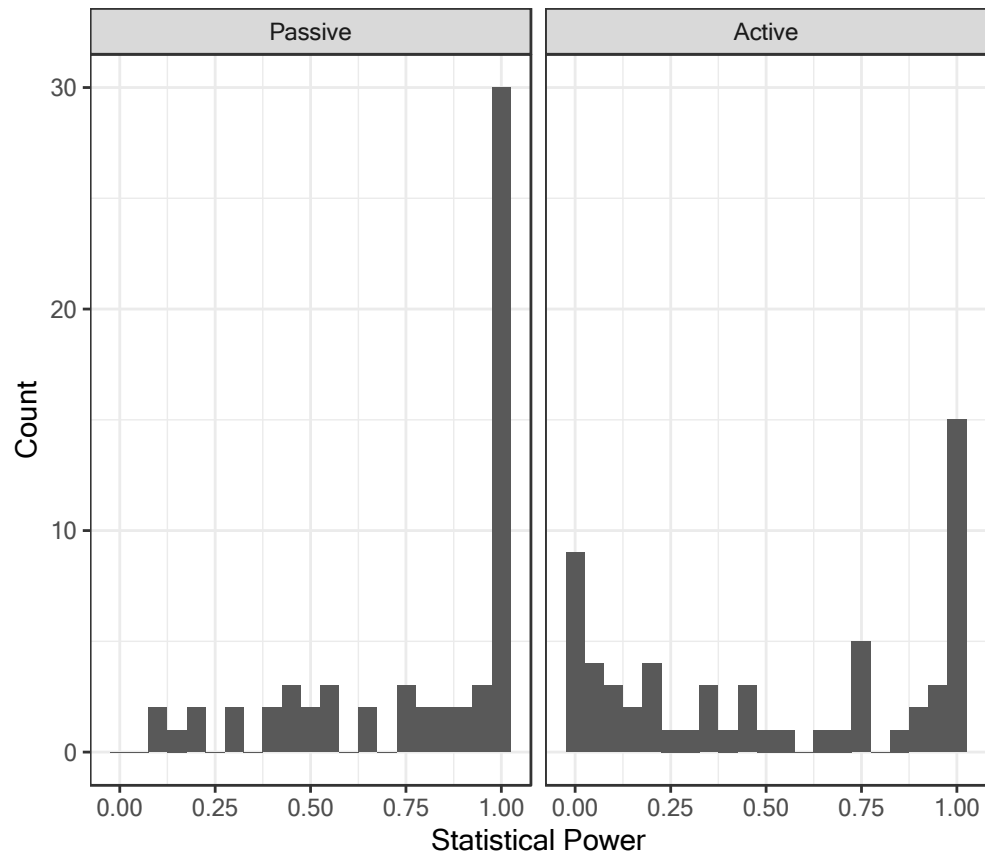

Supplemental Materials Figure 13. Statistical power in the included meta-analyses.
